# Supplementary material for: Inter-site structural heterogeneity induction of single atom Fe catalysts for robust oxygen reduction
Source: PubMed Central journal article supplement (PMC10920901; doi:10.1038/s41467-024-46389-3), 2024-03-07
Supplement: 41467_2024_46389_MOESM1_ESM.pdf [file 41467_2024_46389_MOESM1_ESM.pdf]

## Supplementary Information

### Inter-site structural heterogeneity induction of single atom

### Fe catalysts for robust oxygen reduction

Peng Zhang<sup>1,6</sup>, Hsiao-Chien Chen<sup>2,3,6</sup>, Houyu Zhu<sup>4,6</sup>, Kuo Chen<sup>1</sup>, Tuya Li<sup>4</sup>, Yilin Zhao<sup>1</sup>, Jiaye Li<sup>1</sup>, Ruanbo Hu<sup>5</sup>, Siying Huang<sup>1</sup>, Wei Zhu<sup>5</sup>, Yunqi Liu<sup>1\*</sup> and Yuan Pan<sup>1\*</sup>

<sup>1</sup>State Key Laboratory of Heavy Oil Processing, China University of Petroleum (East China), Qingdao 266580, China

<sup>2</sup>Center for Reliability Science and Technologies, Chang Gung University, Taoyuan 33302, Taiwan

<sup>3</sup>Kidney Research Center, Department of Nephrology, Linkou Chang Gung Memorial Hospital, Taoyuan, 333423, Taiwan

<sup>4</sup>School of Materials Science and Engineering, China University of Petroleum (East China), Qingdao 266580, China

<sup>5</sup>State Key Lab of Organic-Inorganic Composites, Beijing University of Chemical Technology, Beijing, 100029, China

<sup>6</sup>These authors contributed equally: Peng Zhang, Hsiao-Chien Chen, Houyu Zhu

\*Corresponding author: liuyq@upc.edu.cn; panyuan@upc.edu.cn

**This file includes:**

Supplementary Figure 1-44

Supplementary Table 1-10

Supplementary references

## Supplementary Figures

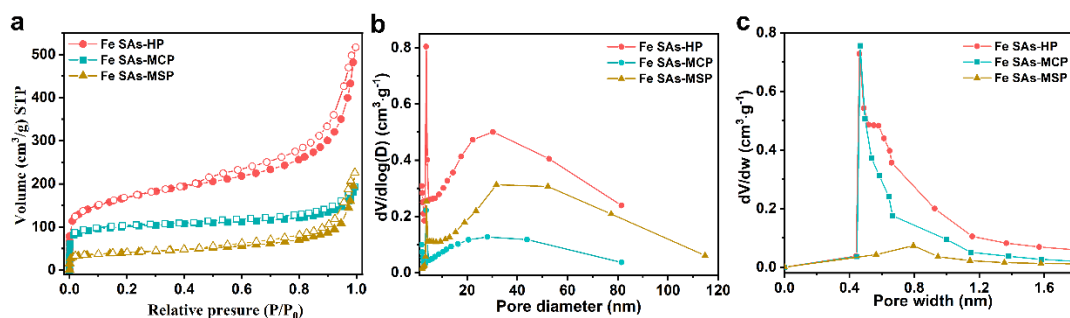

**Supplementary Figure 1. N<sub>2</sub> adsorption-desorption isotherms and pore structure of as-prepared catalysts.** (a) N<sub>2</sub> adsorption-desorption isotherms of as-prepared catalysts and (b)-(c) corresponding pore size distributions. The mesopore and micropore distributions were obtained from Barrett-Joyner-Halenda (BJH) and Horvath-Kawazoe methods, respectively.

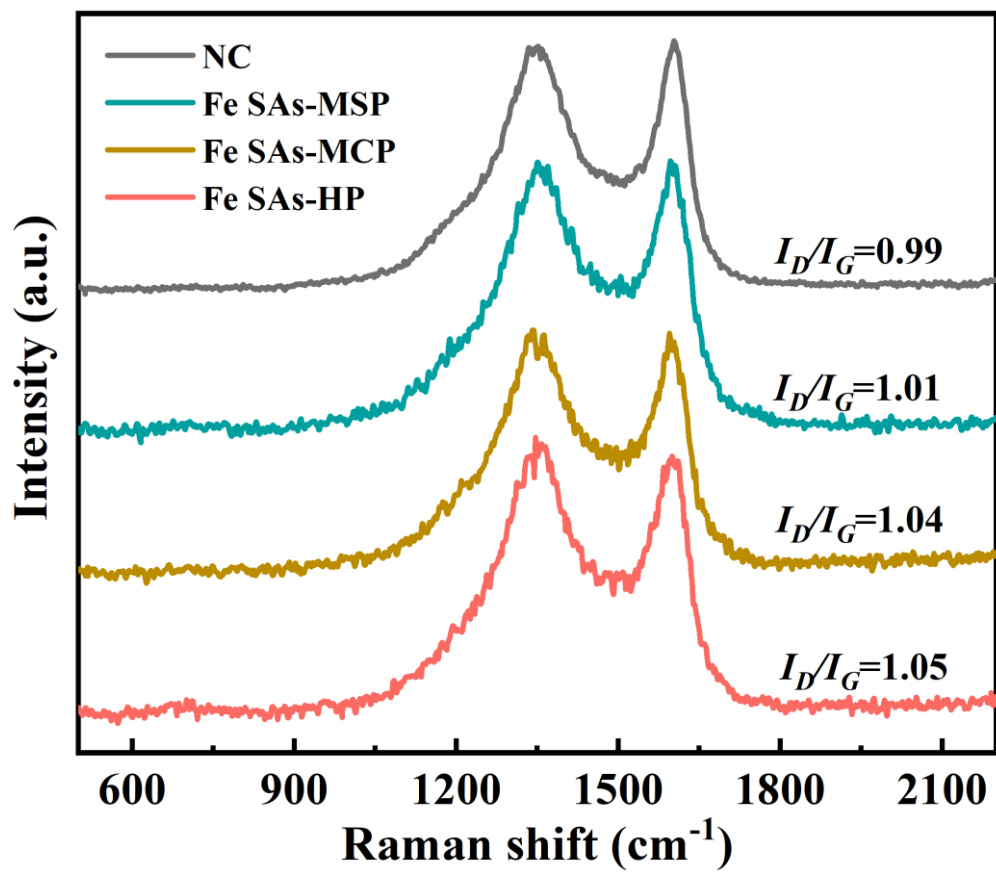

Supplementary Figure 2. Raman spectroscopy of prepared catalysts.

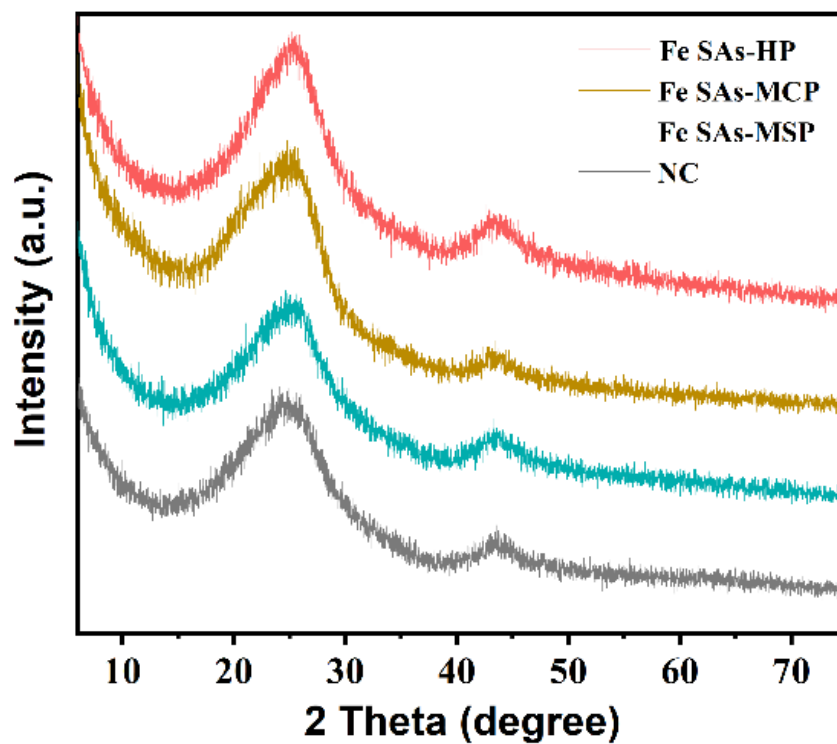

**Supplementary Figure 3.** XRD patterns of prepared catalysts. The catalysts were grinded into powders for XRD characterization.

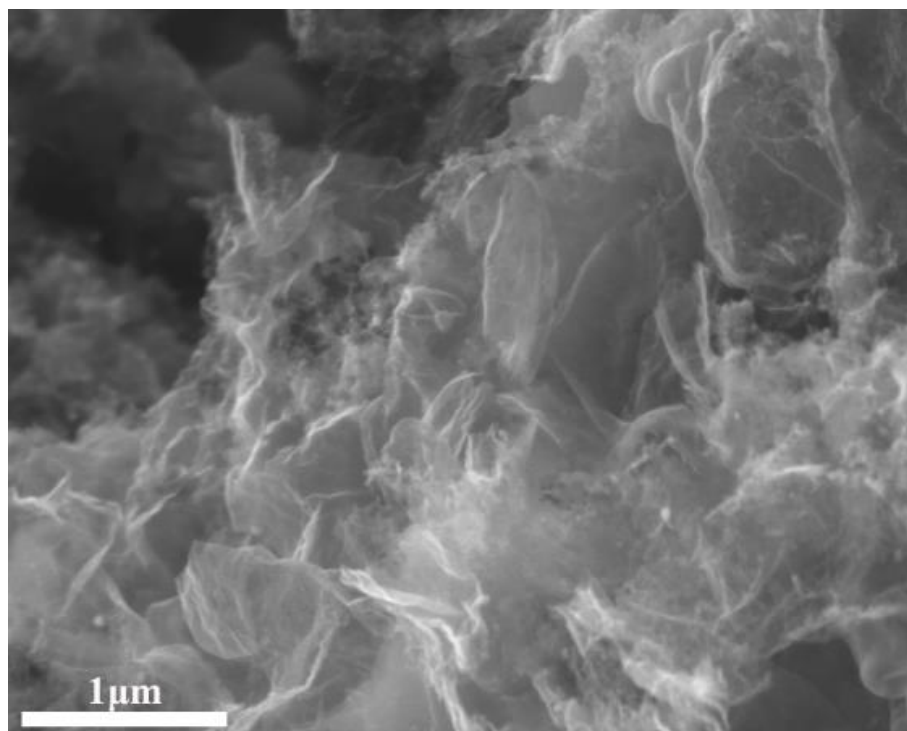

**Supplementary Figure 4.** SEM images of Fe SAs-HP. SEM images show the sheet-like microstructure of Fe SAs-HP.

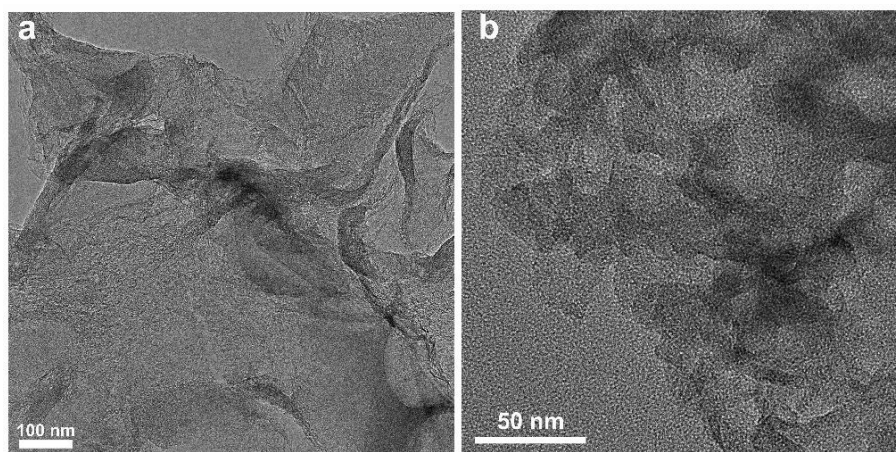

**Supplementary Figure 5. TEM images.** TEM images of (a) Fe SAs-MCP and (b) Fe SAs-MSP. Fe SAs-MCP exhibits sheet-like structure. Fe SAs-MSP exhibits sheet-like structure with dense pores as indicated by the bright dots.

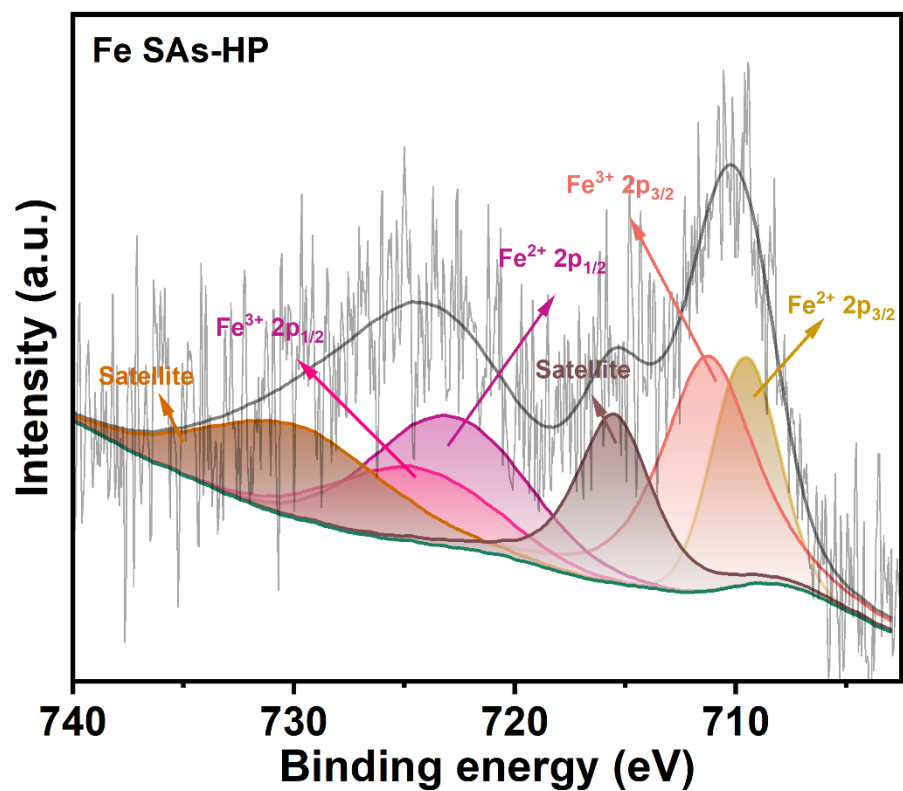

**Supplementary Figure 6.** XPS of Fe in Fe SAs-HP. Fe SAs-HP shows an oxidized valence state of Fe between +2 and +3.



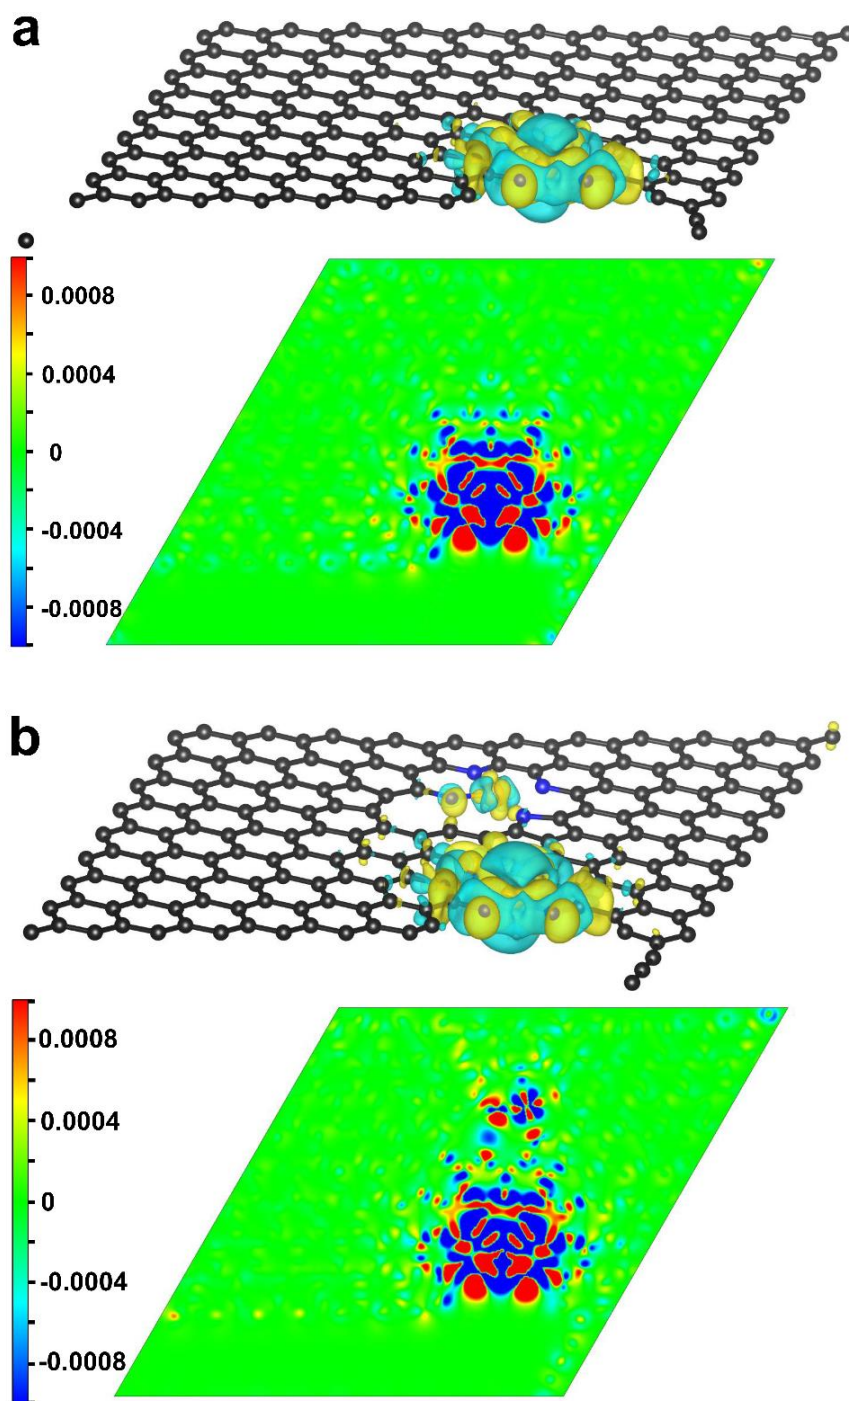

**Supplementary Figure 7. Bader charge and differential charge densities.** (a) Fe-N<sub>4</sub> at mesoporous edge. (b) incorporating microporous Fe-N<sub>4</sub> in the vicinity of mesoporous FeN<sub>4</sub>. Fe atoms at mesoporous edges in structure a will lose 1.24 e<sup>-</sup>. In the case of microporous Fe-N<sub>4</sub> sites, mesoporous Fe atoms will lose 1.25 e<sup>-</sup> and microporous Fe-N<sub>4</sub> will lose 1.2 e<sup>-</sup>.

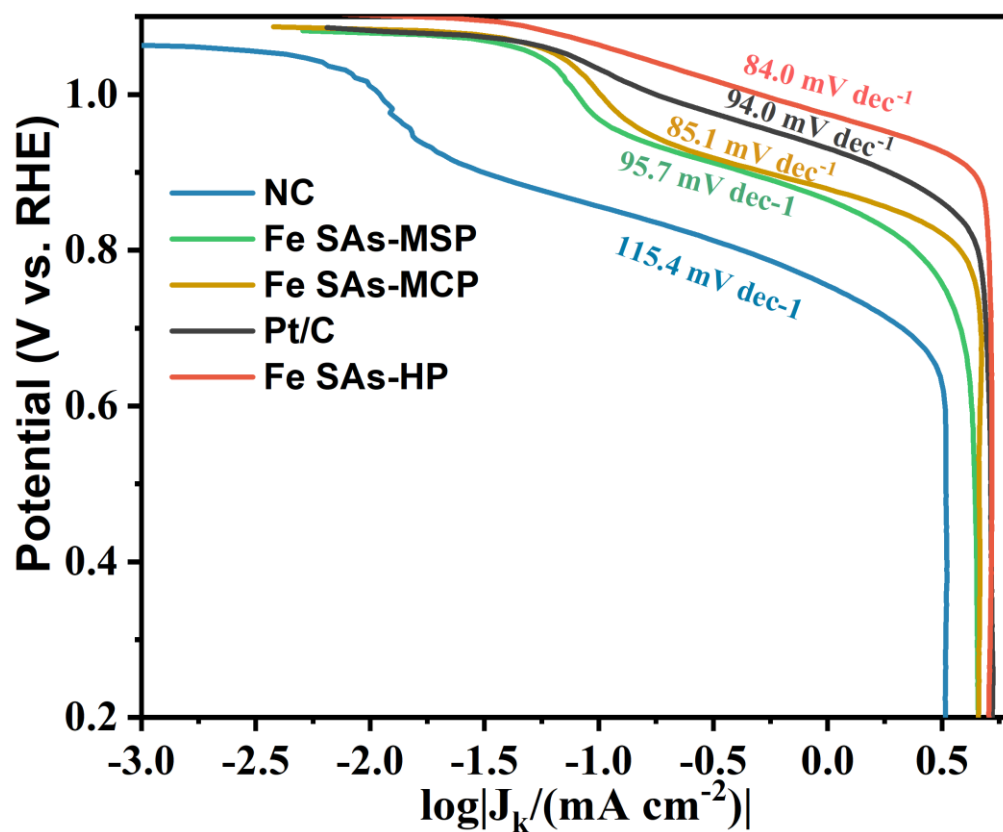

**Supplementary Figure 8.** Tafel slopes of as-prepared catalysts in alkaline medium. Fe SAs-HP exhibits a relative low Tafel slope of 84.0 mV dec<sup>-1</sup>, indicating a faster kinetic.

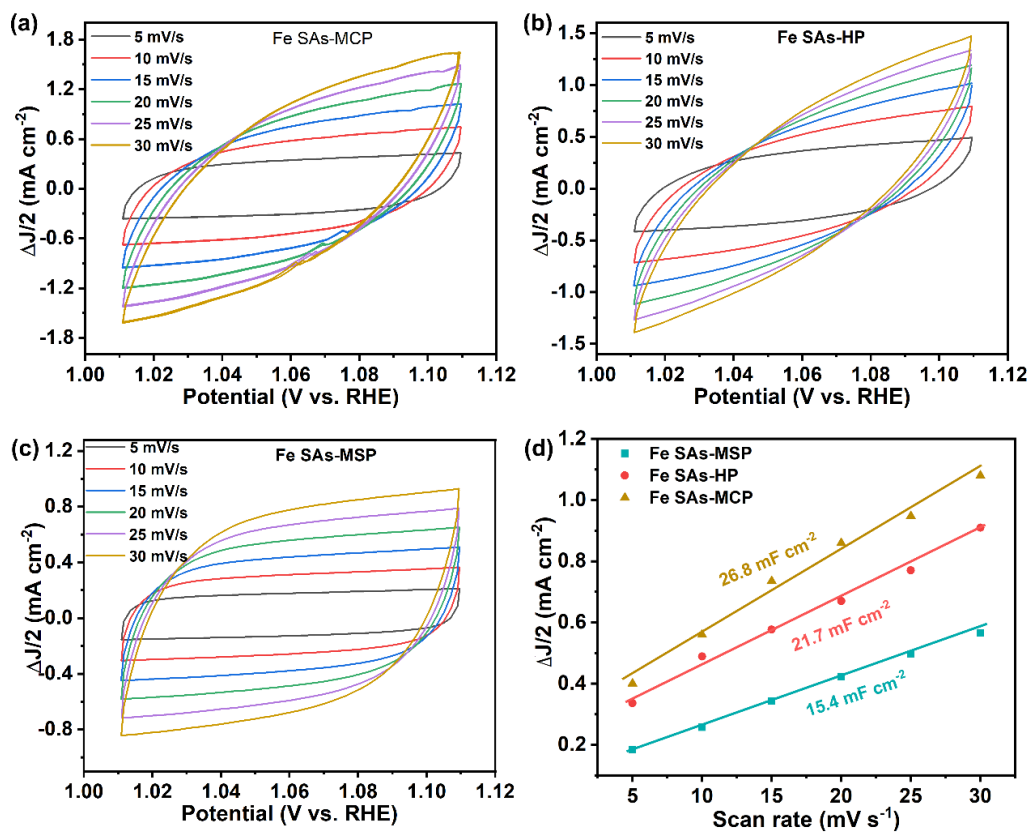

**Supplementary Figure 9. CV curves at different scan rates and double-layer capacitance ( $C_{dl}$ ) of prepared catalysts. (a) CV for Fe SAs-MCP. (b) CV for Fe SAs-HP. (c) CV for Fe SAs-MSP. (d) double-layer capacitance. The  $C_{dl}$  is in proportion to electrochemical active surface area (ECSA). Fe SAs-MCP has the highest  $C_{dl}$  and ECSA.**

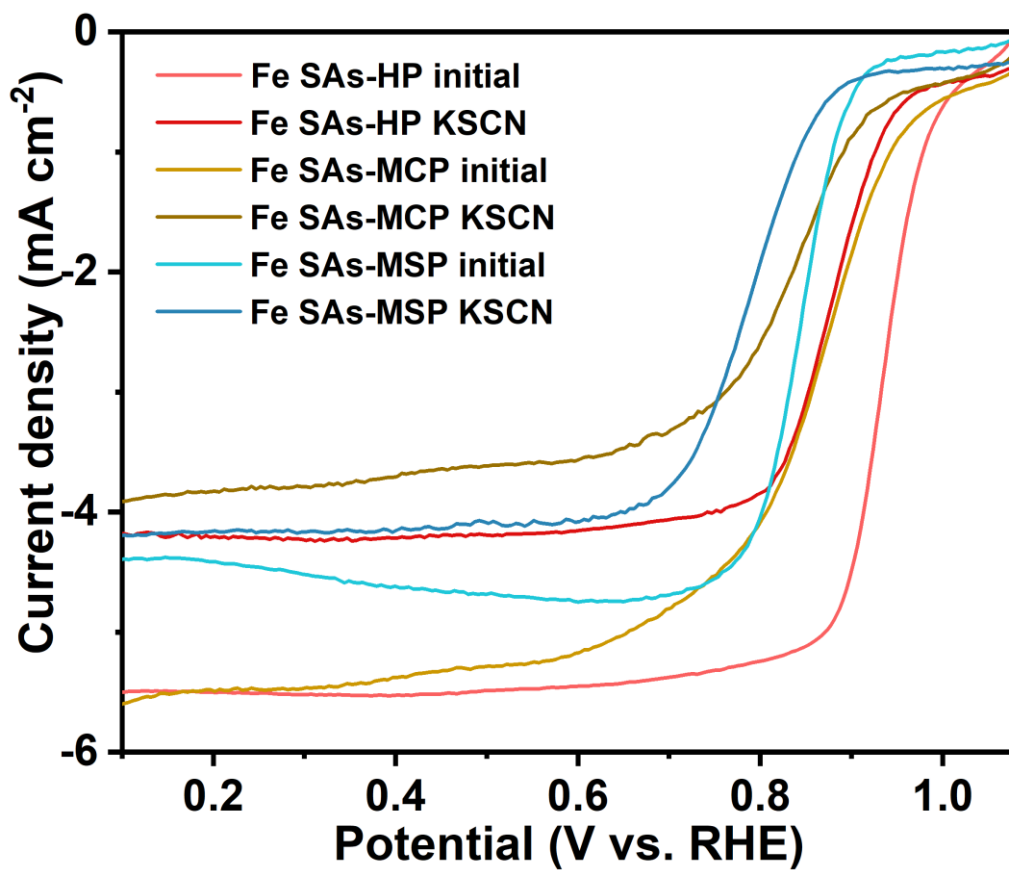

**Supplementary Figure 10.** ORR polarization curves of as-prepared catalysts before and after adding KSCN solutions for 30 min. The scan rate is 5 mV/s.

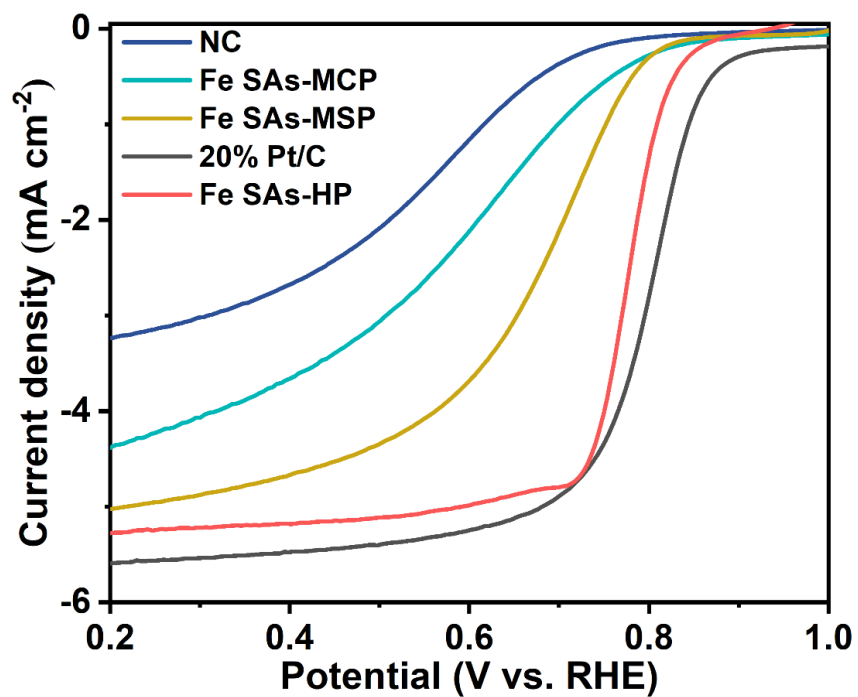

**Supplementary Figure 11.** LSV of as-prepared catalysts measured in 0.1 M HClO<sub>4</sub>. The catalysts loadings are kept at 1.0 mg cm<sup>-2</sup>.

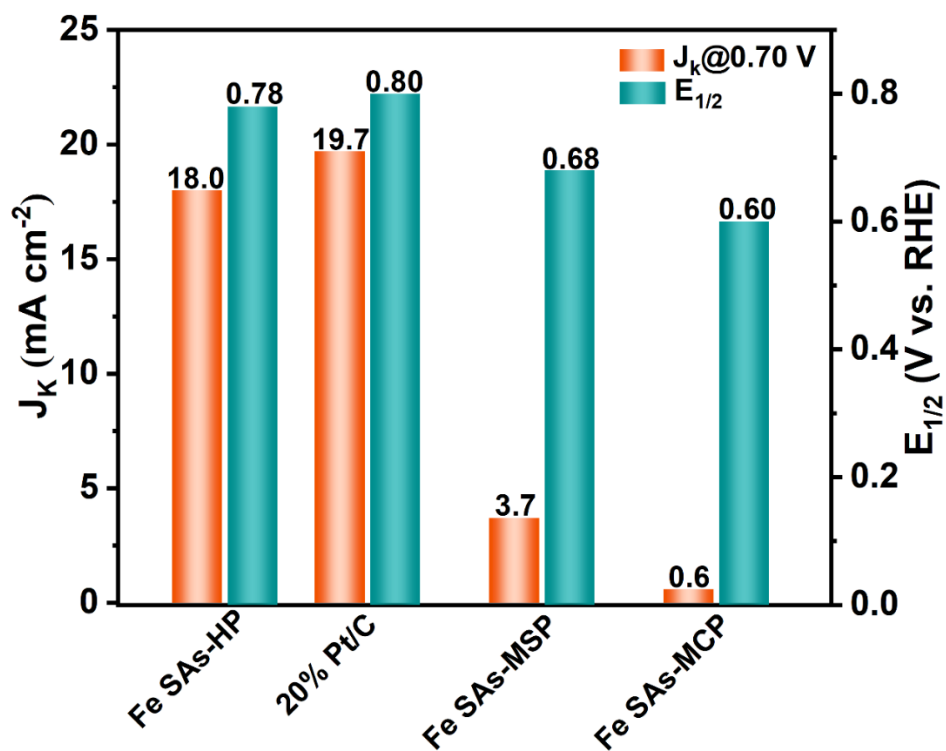

**Supplementary Figure 12.** Comparison of kinetic current density and  $E_{1/2}$  of as-prepared catalysts measured in 0.1 M HClO<sub>4</sub>.

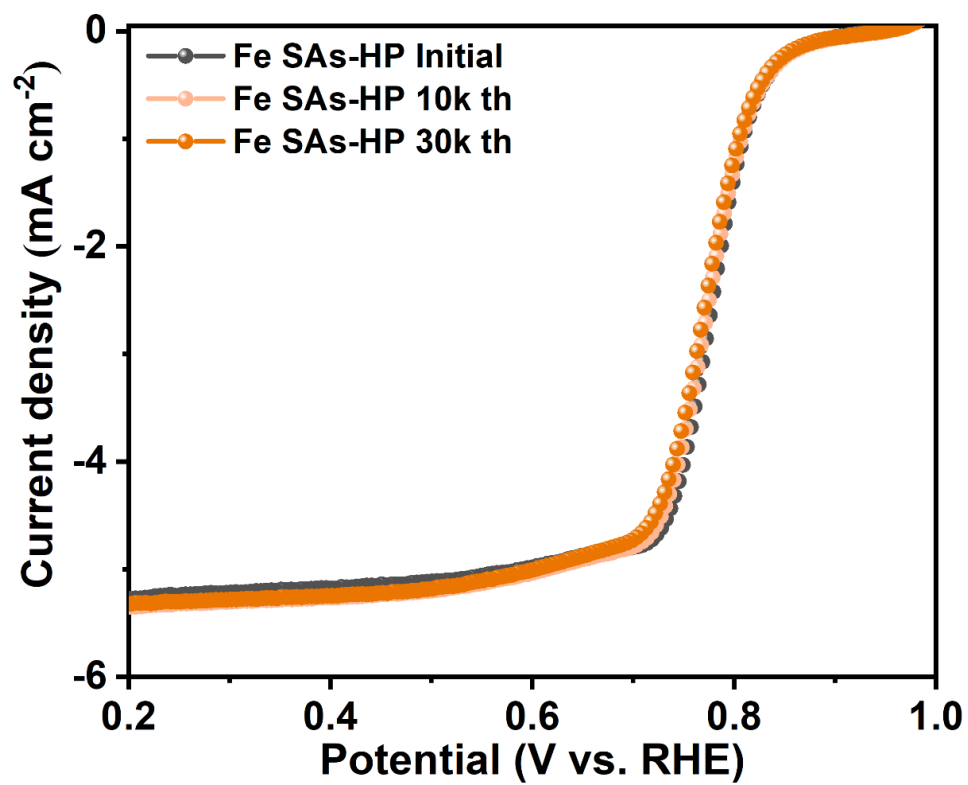

Supplementary Figure 13. LSV of Fe SAs-HP after ADT test in 0.1 M HClO<sub>4</sub>.

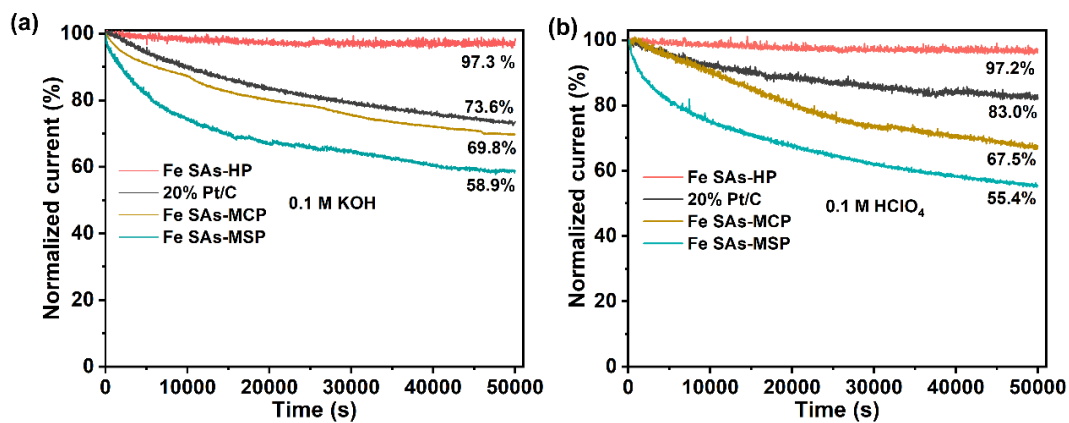

**Supplementary Figure 14. Long-term durability tests.** (a) and (b) *i-t* chronoamperometric tests of prepared catalysts at 0.75 V under 0.1 M KOH and 0.1 M HClO<sub>4</sub>, respectively. Fe SAs-HP shows the highest current retention in both alkaline and acidic electrolytes after 50000s tests.



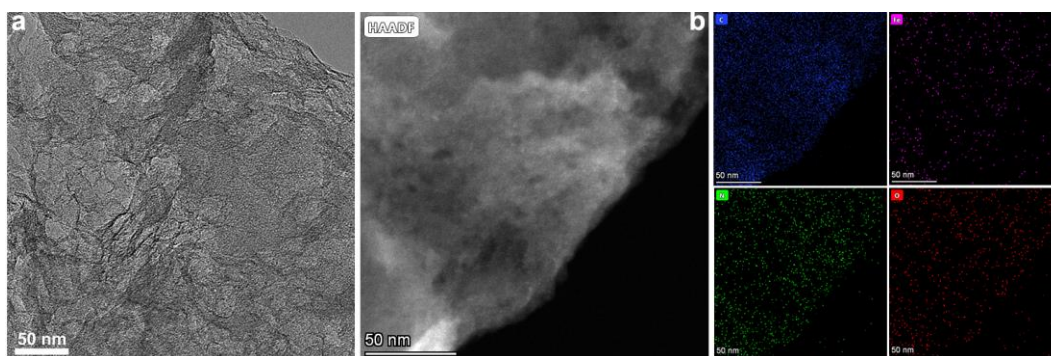

**Supplementary Figure 15. TEM images and corresponding EDS element mapping of Fe SAs-HP after ADT test. (a) TEM image. (b) HAADF-STEM and corresponding EDS element mapping of C, Fe, N and O, respectively. No obvious agglomeration of metal particles can be observed.**

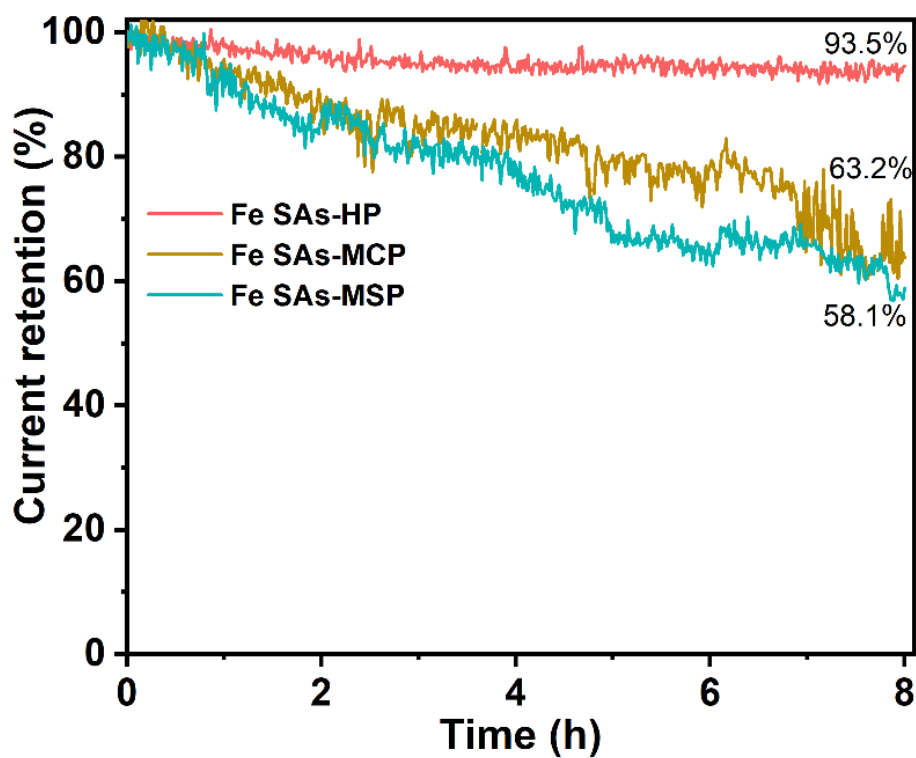

**Supplementary Figure 16.** Harsh i-t chronoamperometric tests of prepared catalysts at 0.2 V under 20 mL of O<sub>2</sub> saturated 0.1 M KOH. Fe SAs-HP exhibits current retention of 93.5 %. The violent fluctuate of tested curves were ascribed to the limited volume of electrolytes.

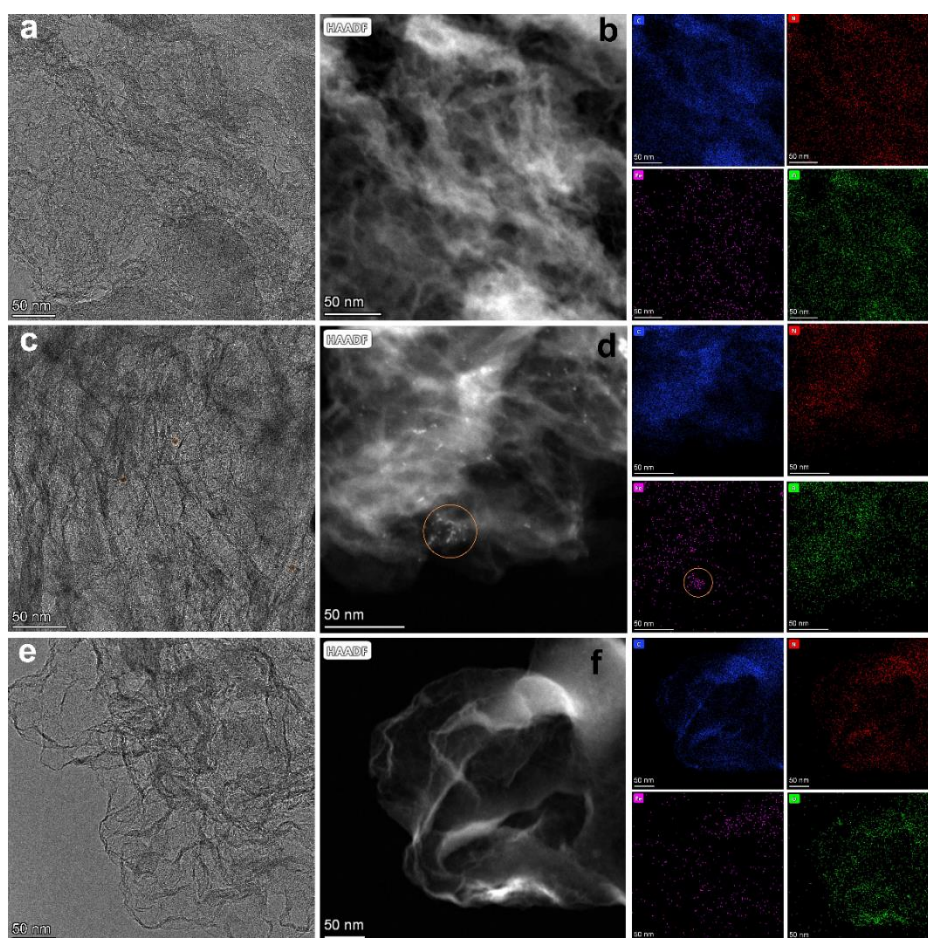

**Supplementary Figure 17. High resolution TEM, HAADF STEM and corresponding element mapping after harsh durability tests. (a) and (b) Fe SAs-HP; (c) and (d) Fe SAs-MCP; (e) and (f) Fe SAs-MSP. Fe SAs-HP and Fe SAs-MSP show no obvious aggregation of metal particles. However, tiny metal clusters can be observed for Fe SAs-MCP after harsh durability tests.**

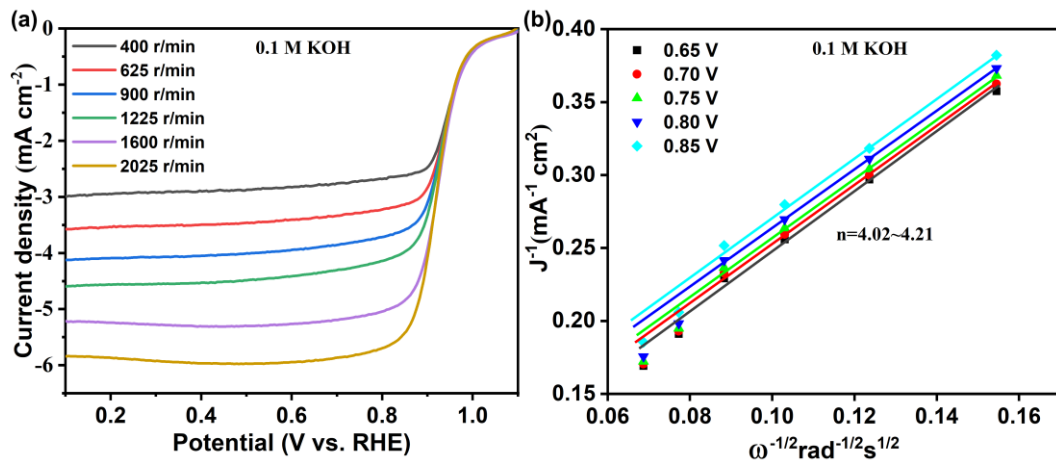

**Supplementary Figure 18. LSV curves at different rotations and charge transfer number in 0.1 M KOH.** (a) ORR polarization curves of Fe SAs-HP at different rotations under 0.1 M KOH and (b) corresponding charge transfer number. Fe SAs-HP exhibits 4- $e^-$  ORR process under alkaline electrolytes.

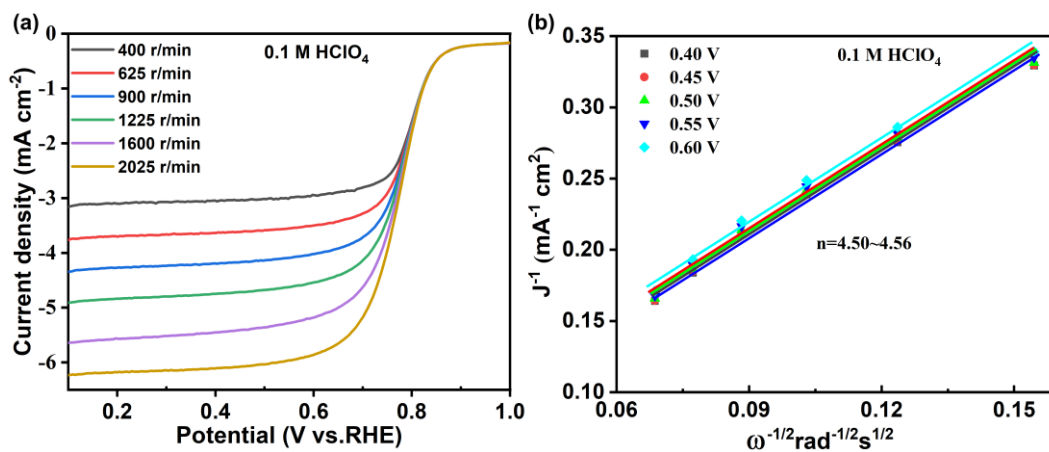

**Supplementary Figure 19. LSV curves at different rotations and charge transfer number in 0.1 M HClO<sub>4</sub>.** (a) ORR polarization curves of Fe SAs-HP at different rotations under 0.1 M HClO<sub>4</sub> and (b) corresponding charge transfer number. Fe SAs-HP exhibits an approximate 4-e<sup>-</sup> ORR process under acidic electrolytes.

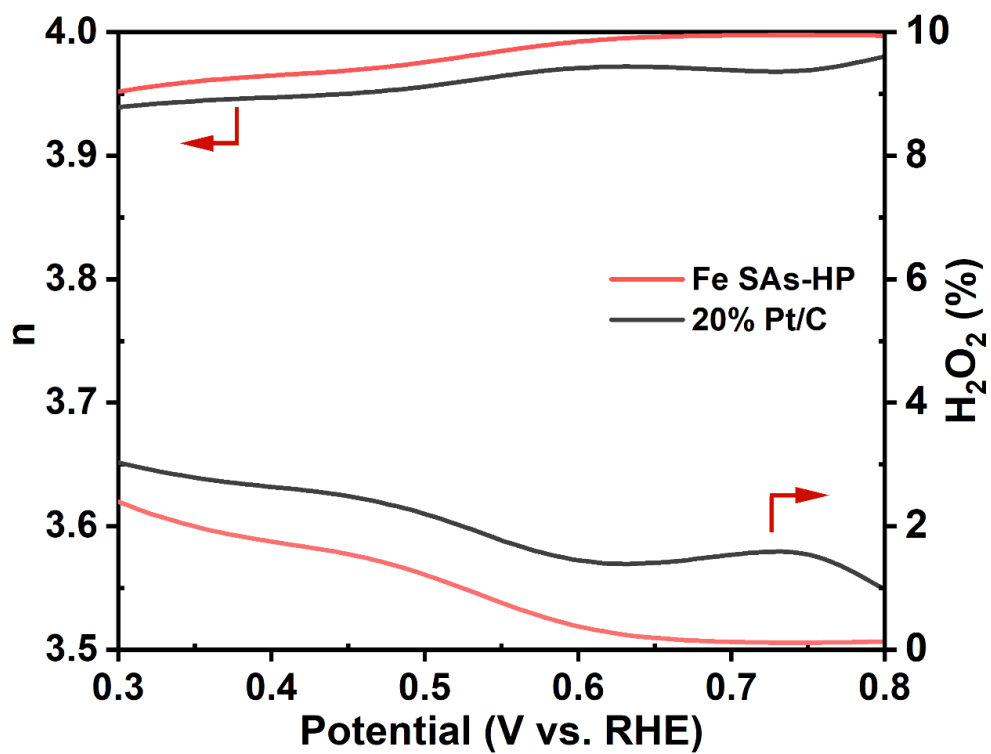

**Supplementary Figure 20.** Charge transfer number and H<sub>2</sub>O<sub>2</sub> yield of Fe SAs-HP and 20% Pt/C by RRDE test. Fe SAs-HP shows 4-e<sup>-</sup> ORR process with low H<sub>2</sub>O<sub>2</sub> yield.

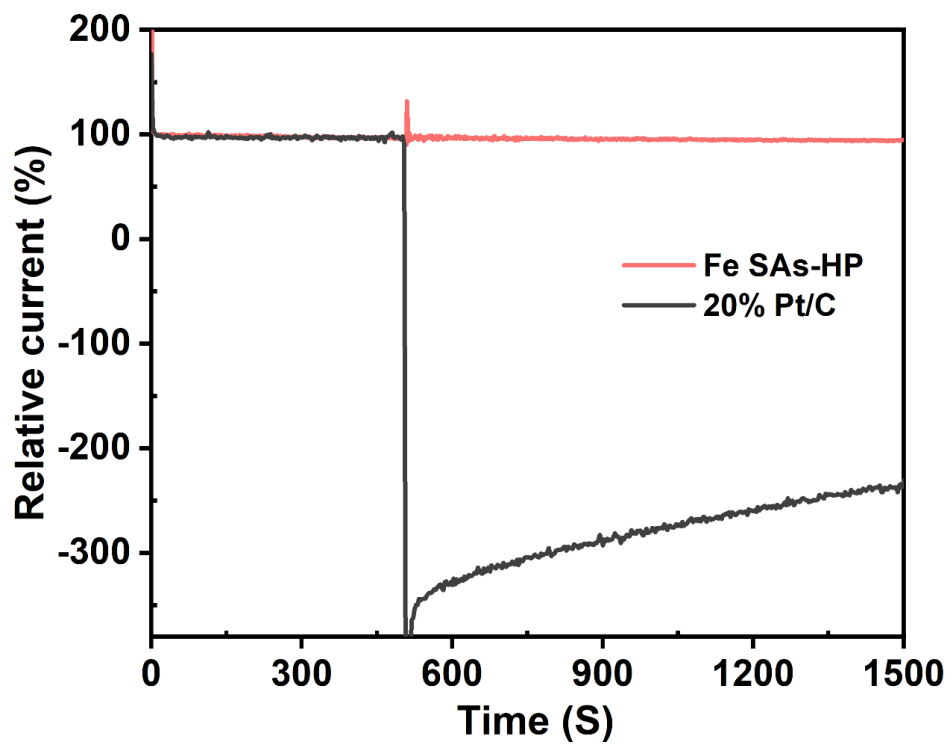

**Supplementary Figure 21.** Methanol tolerance test of Fe SAs-HP and 20% Pt/C. The methanol was injected at 500 s.

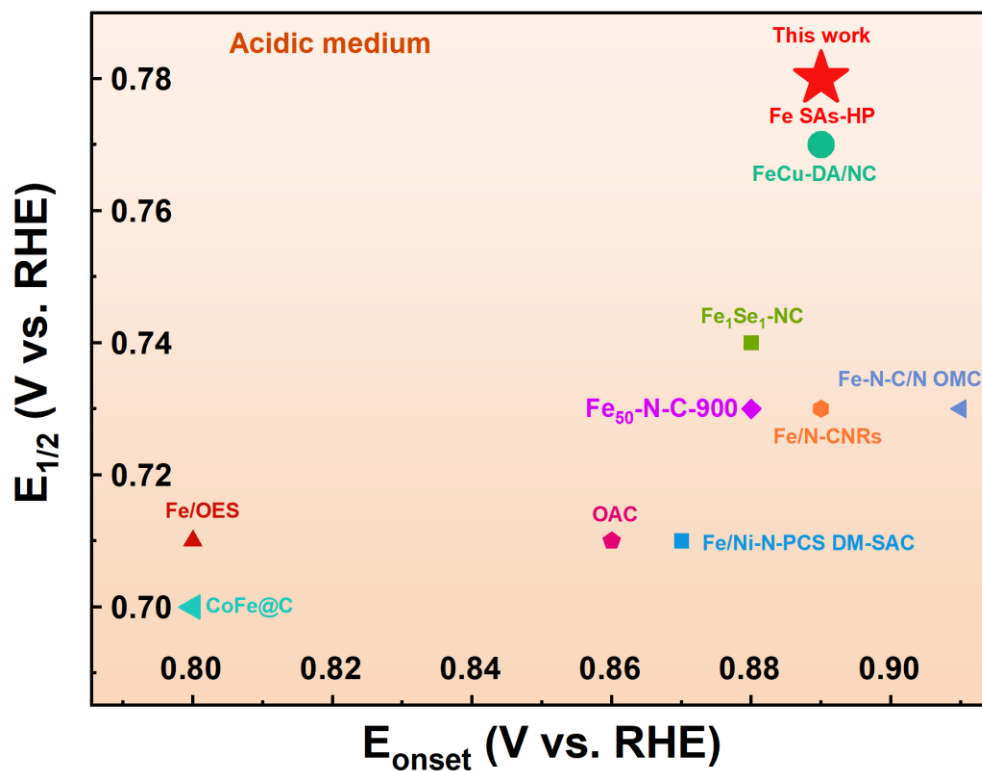

**Supplementary Figure 22.** Comparison of acidic ORR performance for Fe SAs-HP with reported catalysts. The reported catalysts are summarized in supplementary table 5.



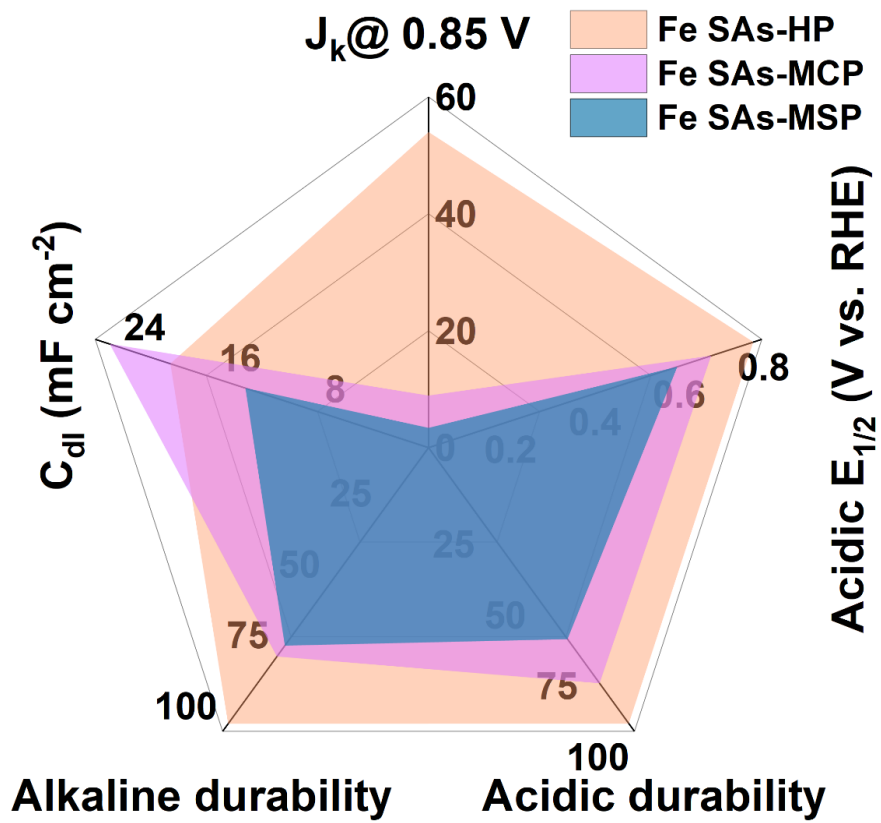

**Supplementary Figure 23.** Comprehensive performance of as-prepared catalysts with different pore structure.

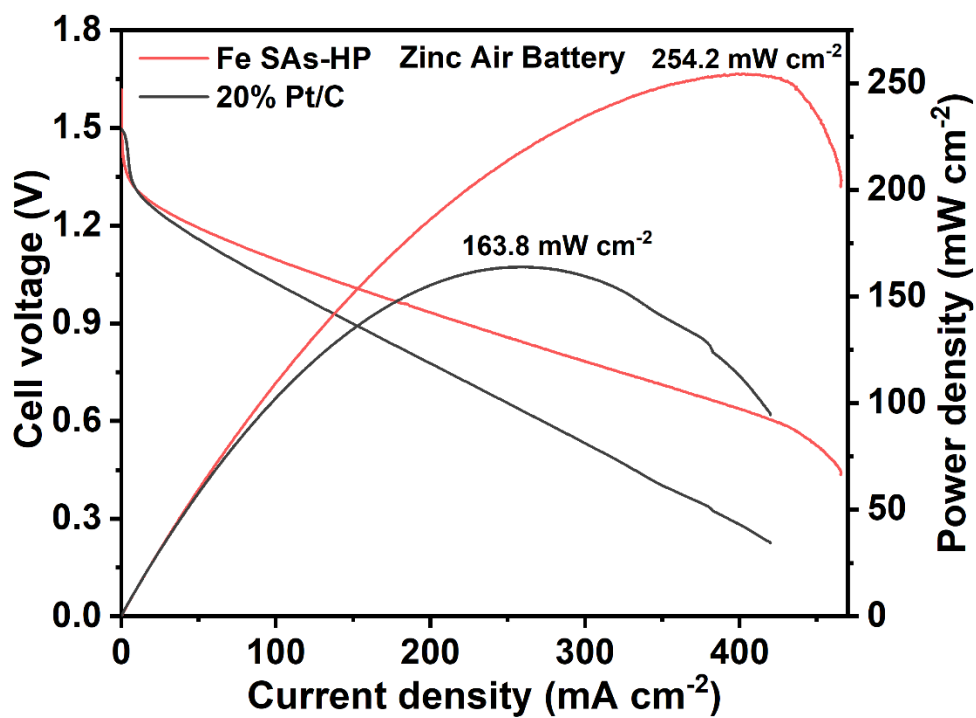

**Supplementary Figure 24.** Polarization curves and corresponding power density of assembled zinc air batteries with Fe SAs-HP and commercial Pt/C as air cathodes. Fe SAs-HP exhibits peak power density of 254.2 mW cm<sup>-2</sup>.

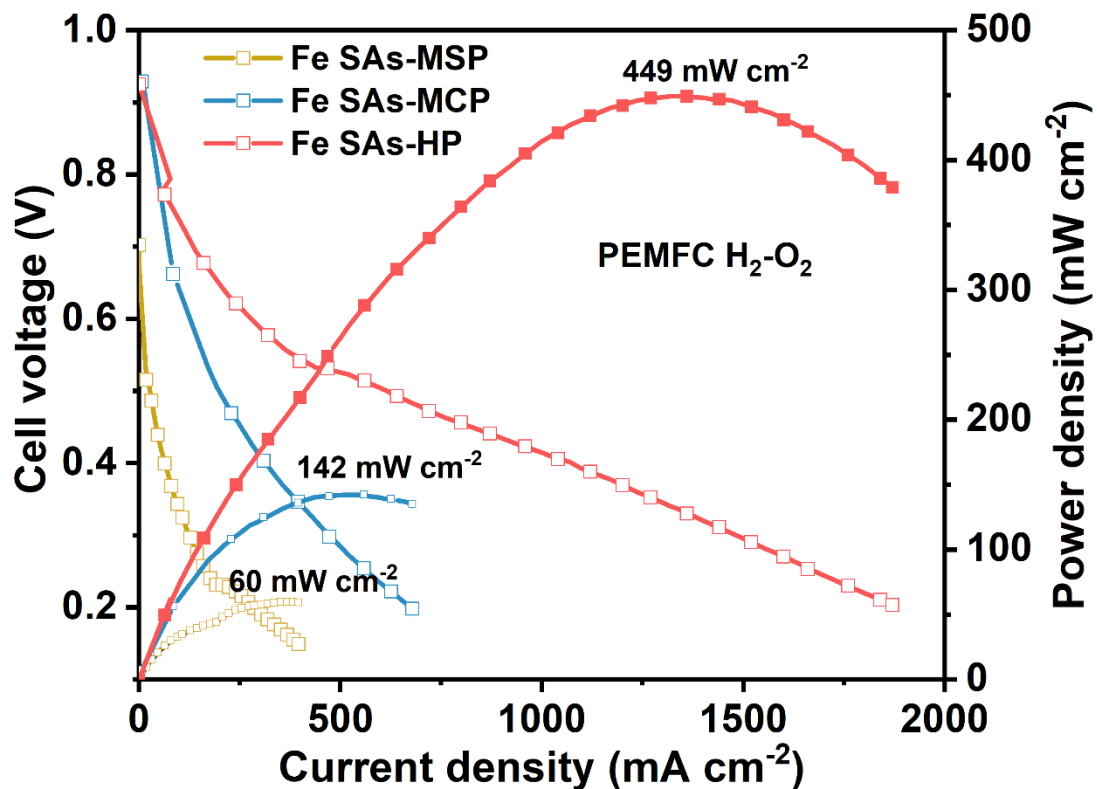

**Supplementary Figure 25.** Polarization curves and corresponding power density of assembled H<sub>2</sub>-O<sub>2</sub> PEMFC of prepared catalysts. Fe SAs-HP exhibits peak power density of 449 mW cm<sup>-2</sup>, followed by Fe SAs-MCP and Fe SAs-MSP.

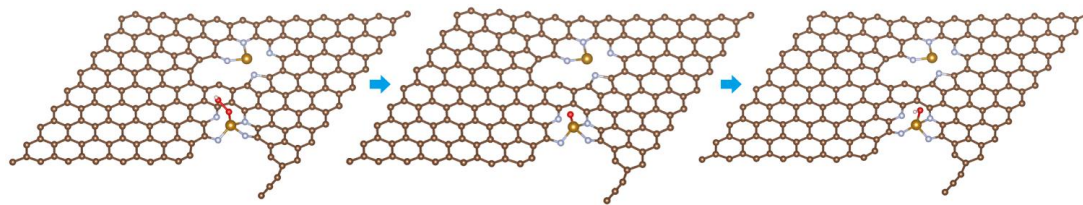

**Supplementary Figure 26.** Simulated ORR reaction pathway of Fe SAs-HP at mesoporous Fe-N<sub>4</sub> sites (Fe SAs-HP@MSP).

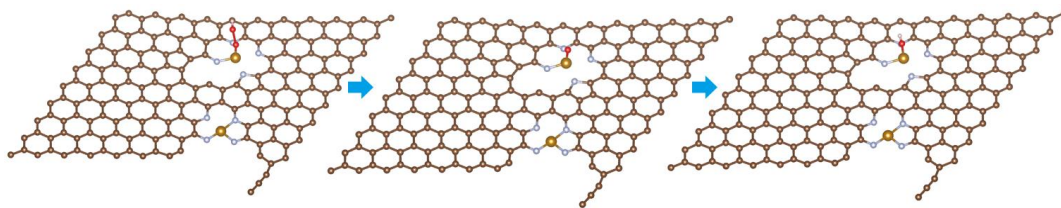

**Supplementary Figure 27.** Simulated ORR reaction pathway of Fe SAs-HP at microporous Fe-N<sub>4</sub> sites (Fe SAs-HP@MCP)

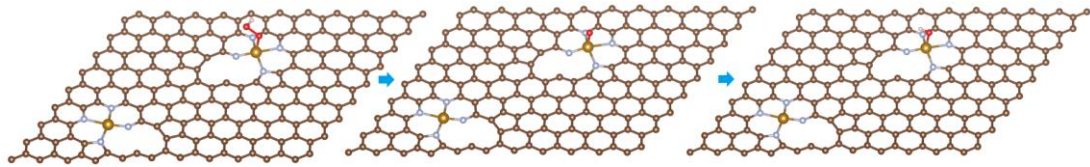

**Supplementary Figure 28.** Simulated ORR reaction pathway of Fe SAs-MCP on microporous Fe-N<sub>4</sub> sites (Fe SAs-MCP)

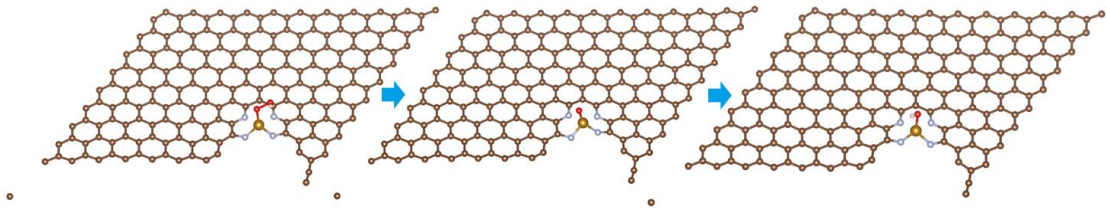

**Supplementary Figure 29.** Simulated ORR reaction pathway of Fe SAs-MSP on mesoporous Fe-N<sub>4</sub> sites (Fe SAs-MSP)

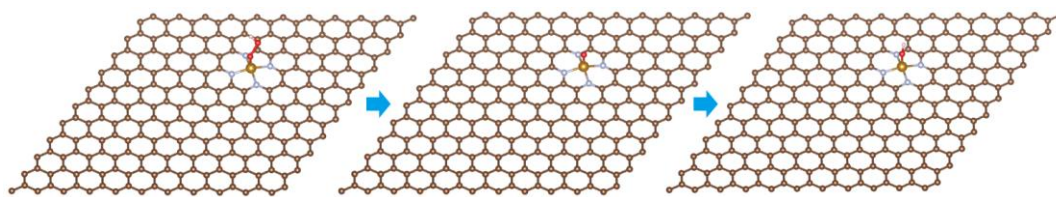

**Supplementary Figure 30.** Simulated ORR reaction pathway of conventional in-plane type Fe-N<sub>4</sub> sites (FeN<sub>4</sub>-in plane)



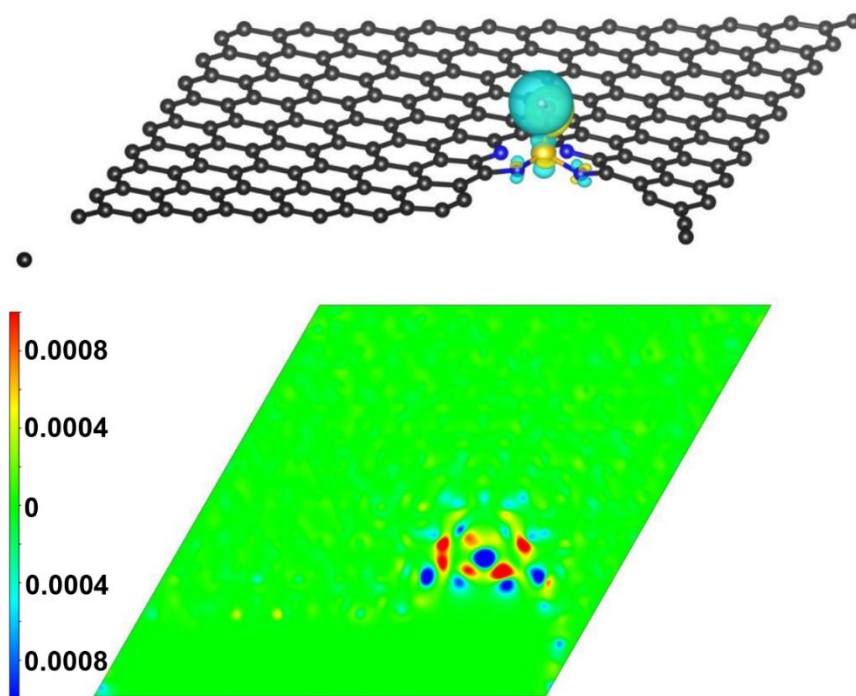

**Supplementary Figure 31.** Differential charge densities of single mesoporous Fe-N<sub>4</sub> sites after adsorption of \*OH. Central Fe atoms will lose 1.379 e<sup>-</sup>, while \*OH will gain 0.497 e<sup>-</sup>.

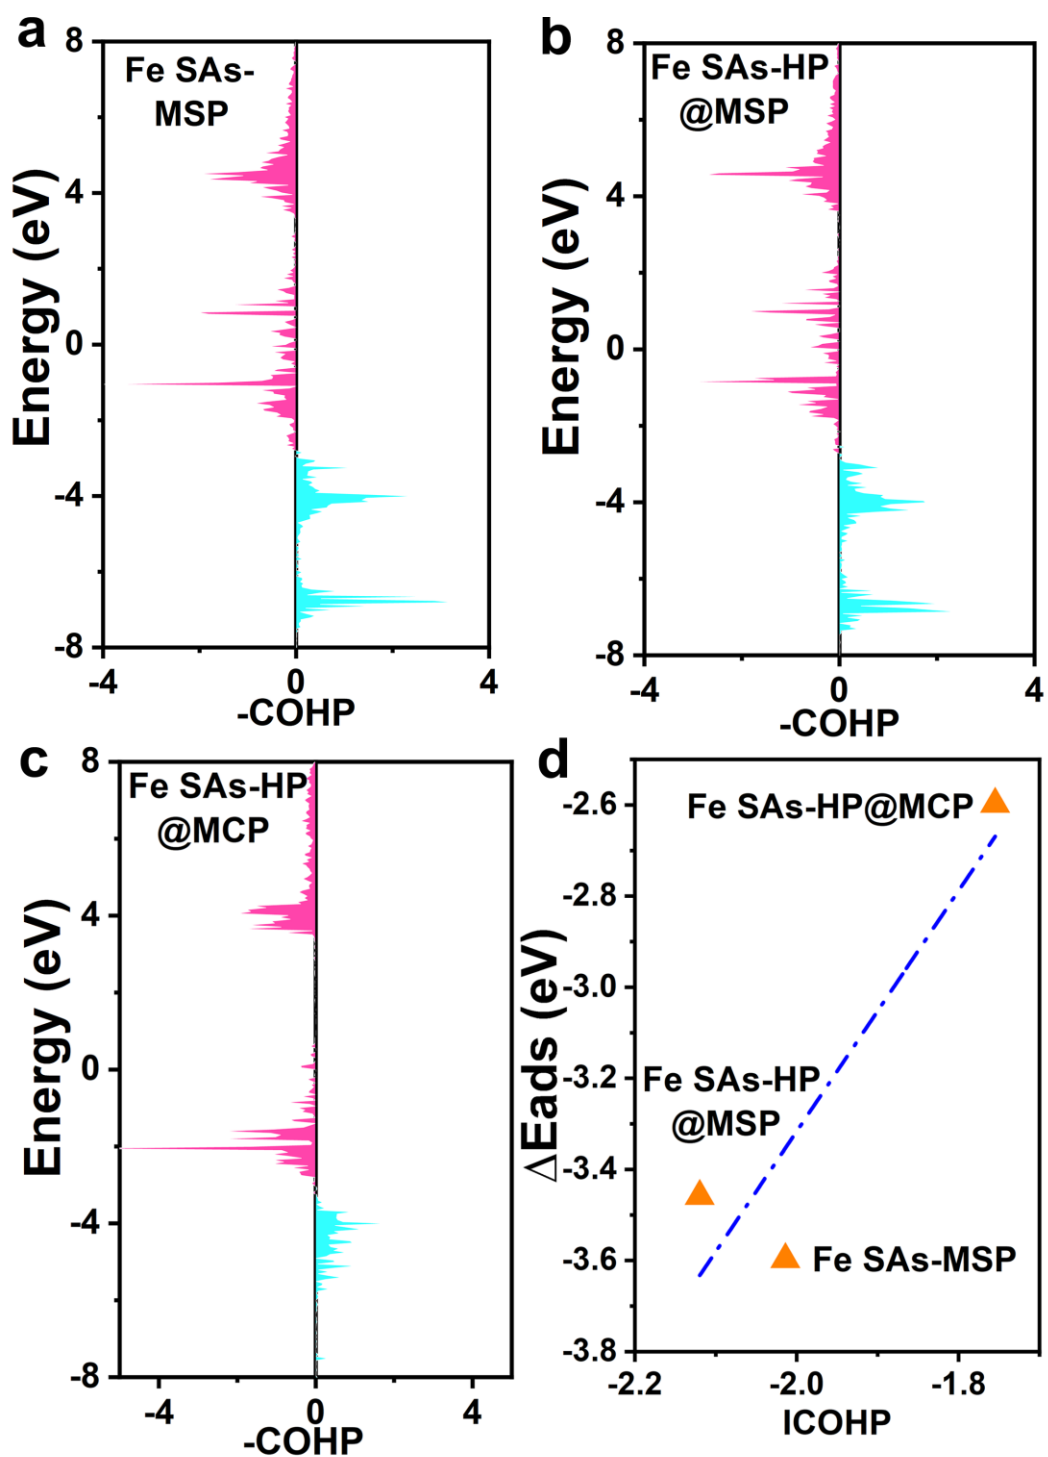

Supplementary Figure 32. The projected crystal orbital Hamilton population (COHP) and integrated COHP (ICOHP) of as-prepared catalysts. (a) Fe SAs-MSP. (b) Fe SAs-HP@MSP. (c) Fe SAs-HP@MCP. (d) ICOHP. Fe SAs-HP@MSP has the optimized adsorption for \*OH.

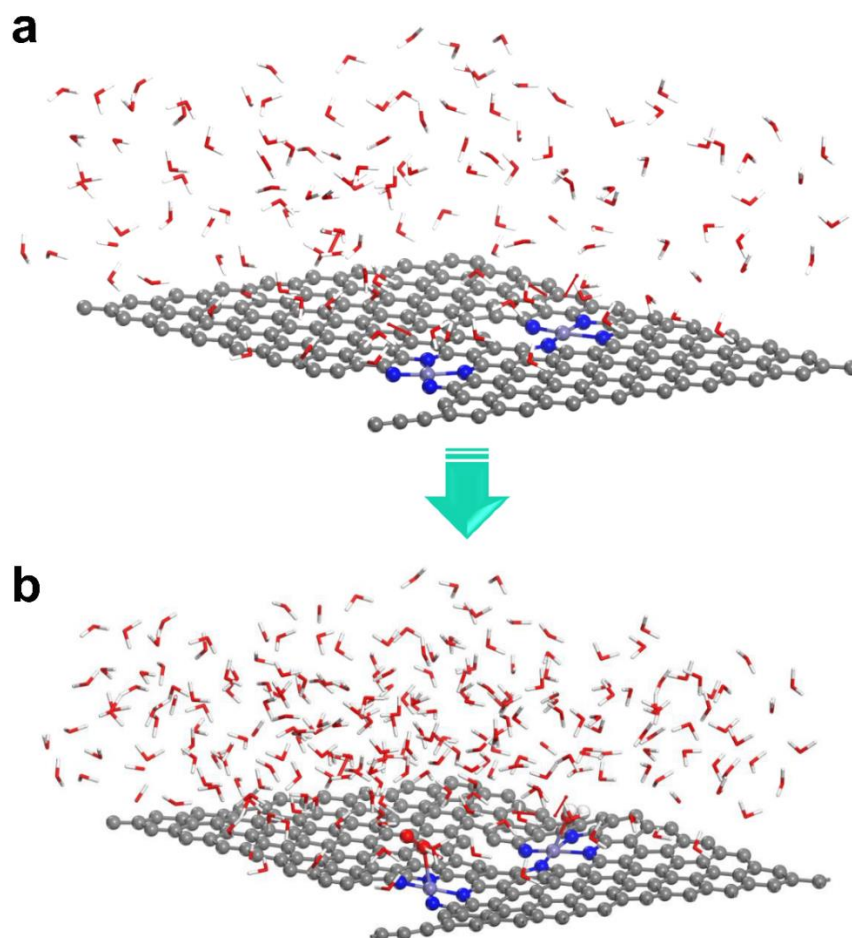

**Supplementary Figure 33. AIMD simulated interfacial structure of Fe SAs-HP.** (a) initial state and (b) final state of dynamic adsorption. The  $\text{O}_2$  molecules are preferentially adsorbed on mesoporous sites. And  $\text{H}_2\text{O}$  molecules are adsorbed on microporous sites.

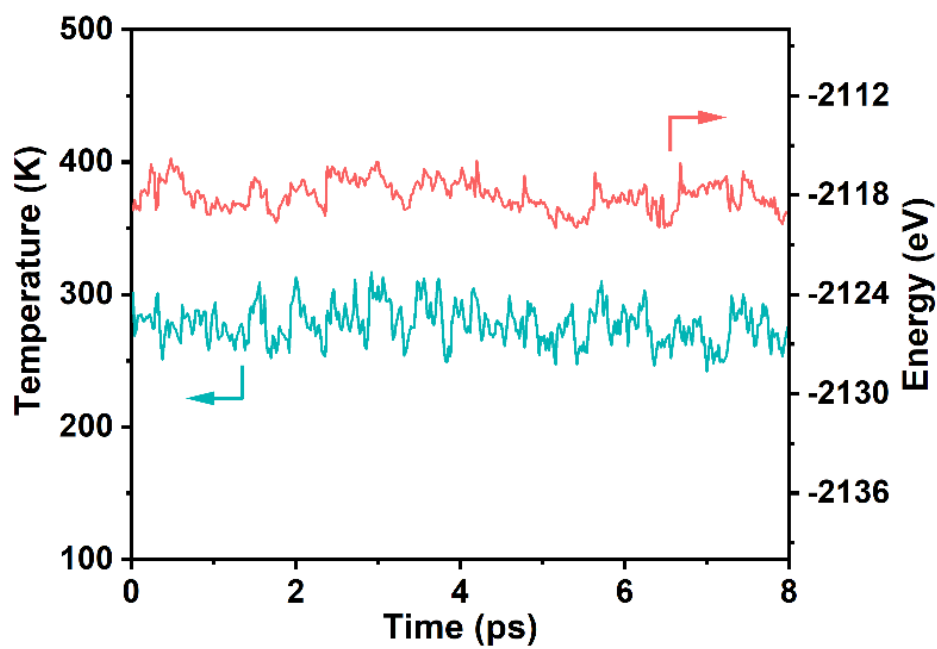

**Supplementary Figure 34.** Energy and temperature fluctuation during simulations. Energy and temperature fluctuated within a certain range.

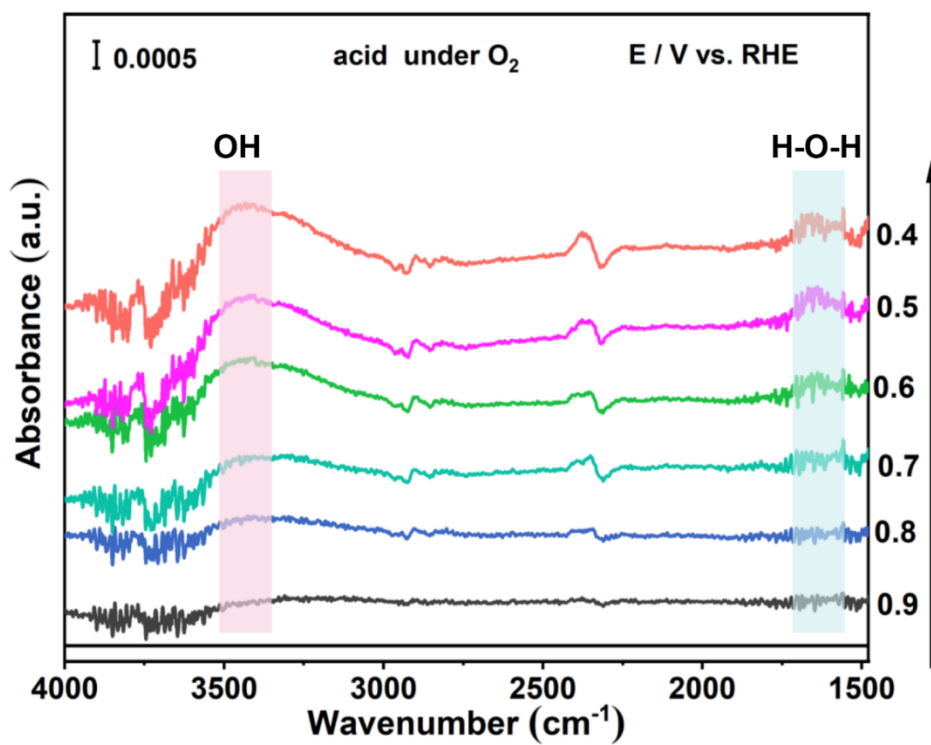

**Supplementary Figure 35.** *In situ* ATR-SEIRAS of Fe SAs-HP under acidic media. The adsorption of OH and H-O-H increased with applied overpotentials.

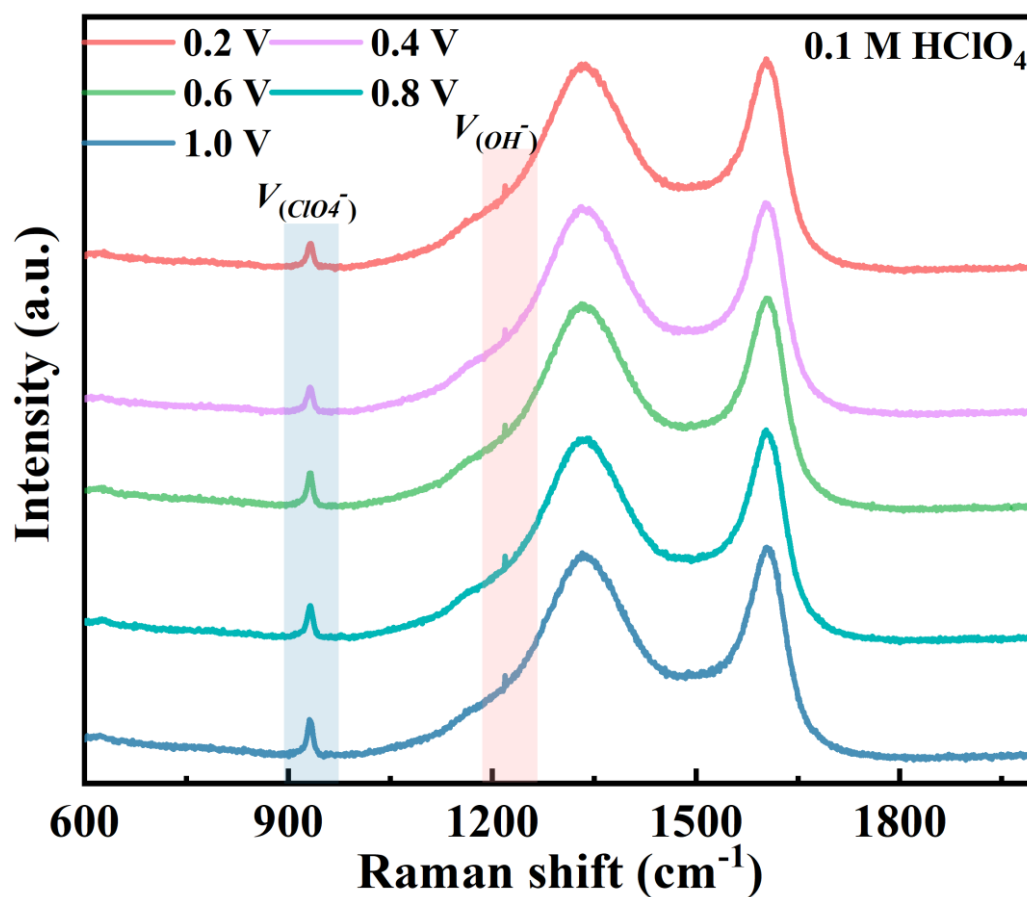

**Supplementary Figure 36.** *In situ* Raman spectra of Fe SAs-HP tested in 0.1 M HClO<sub>4</sub>. The vibration of ClO<sub>4</sub><sup>-</sup> and OH<sup>-</sup> can be observed.

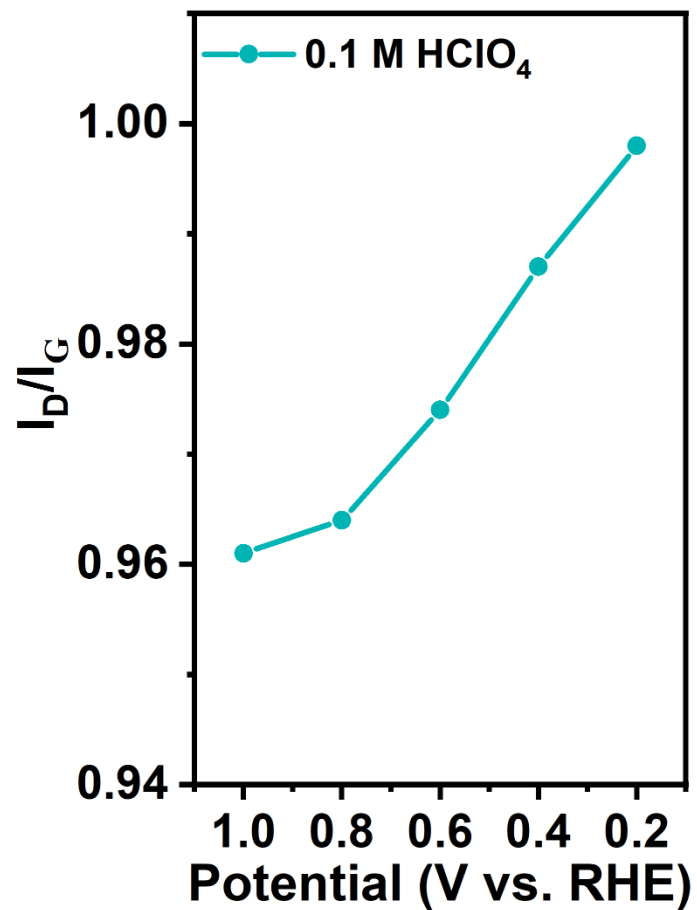

**Supplementary Figure 37.**  $I_D/I_G$  values with applied overpotentials under acidic working conditions.  $I_D/I_G$  shifted to higher values from 0.96 to 1.00 with applied overpotentials.

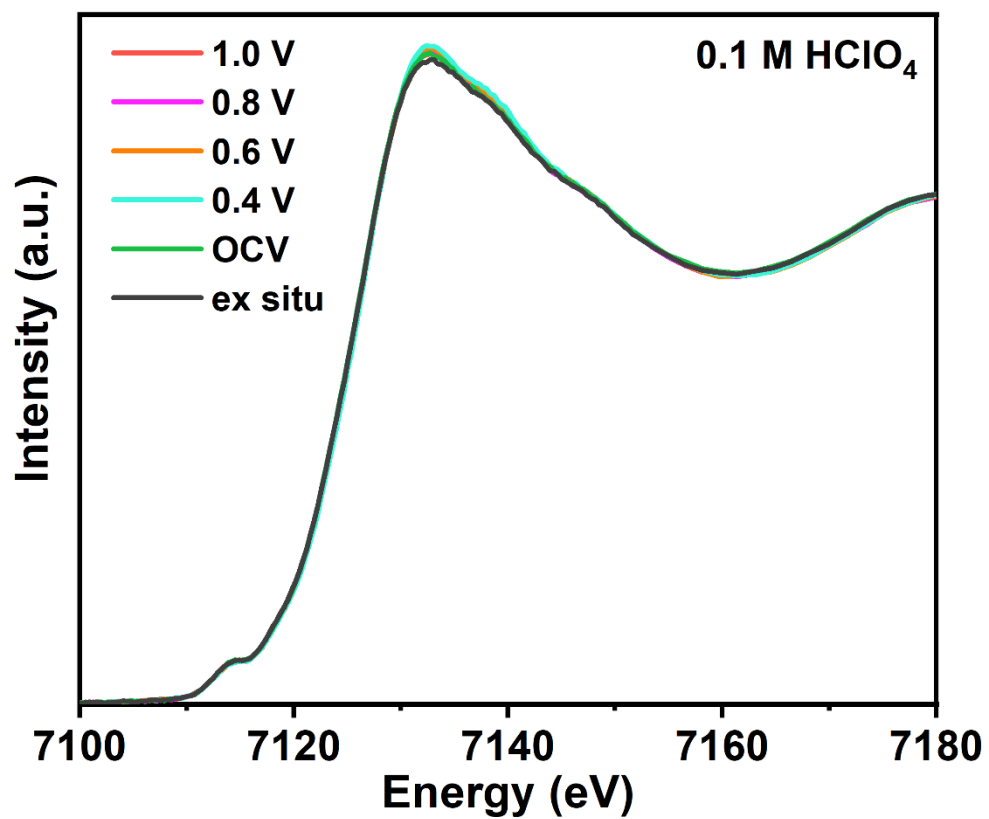

**Supplementary Figure 38.** *Operando* XANES of Fe K-edge for Fe SAs-HP in 0.1 M HClO<sub>4</sub>. The XAS was conducted under O<sub>2</sub> saturated acidic electrolytes.



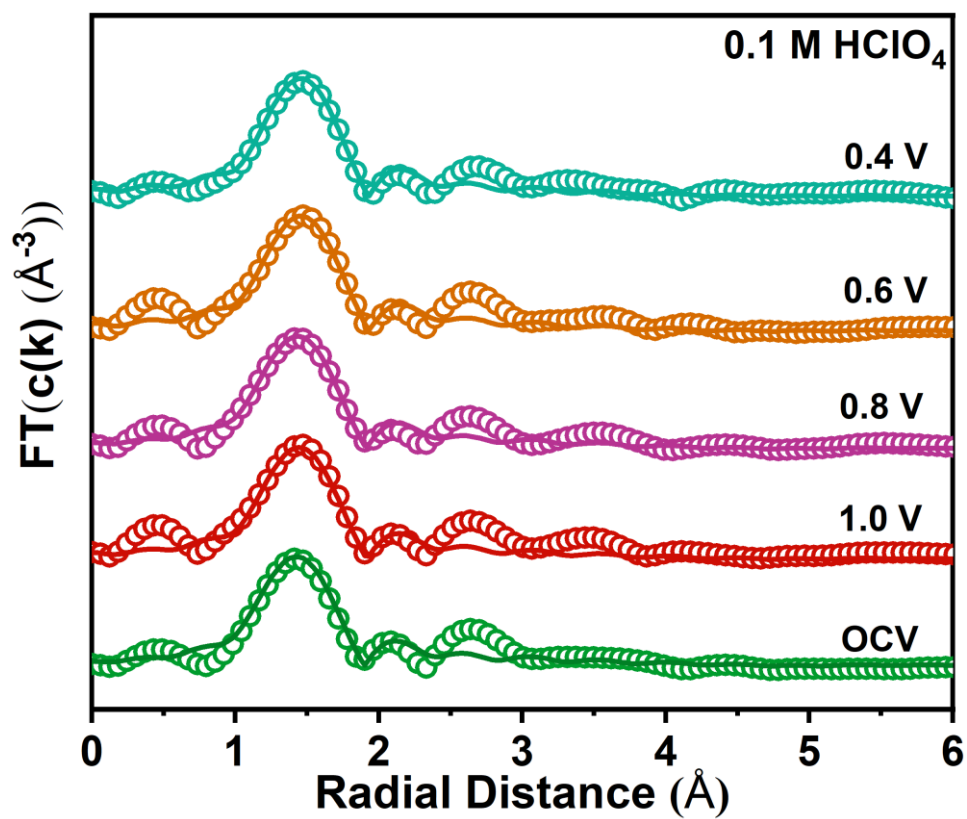

**Supplementary Figure 39.** corresponding FT-EXAFS fitting analysis of Fe SAs-HP under 0.1 M HClO<sub>4</sub>.

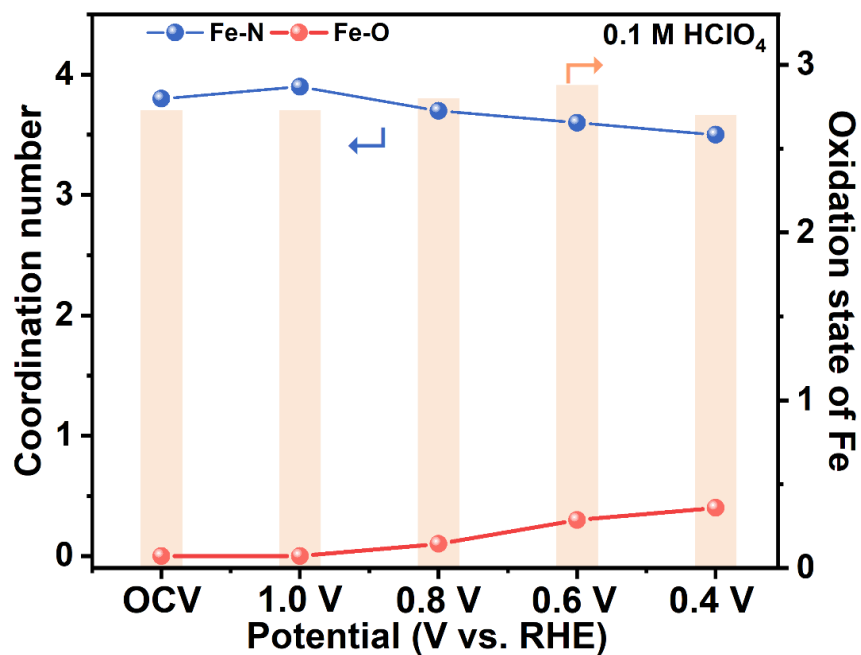

**Supplementary Figure 40.** Corresponding coordination number for Fe-N and Fe-O as well as oxidation state of Fe under acidic working conditions. Active Fe-N<sub>4</sub> centers remained the Fe-N<sub>4</sub> structure under acidic working conditions.

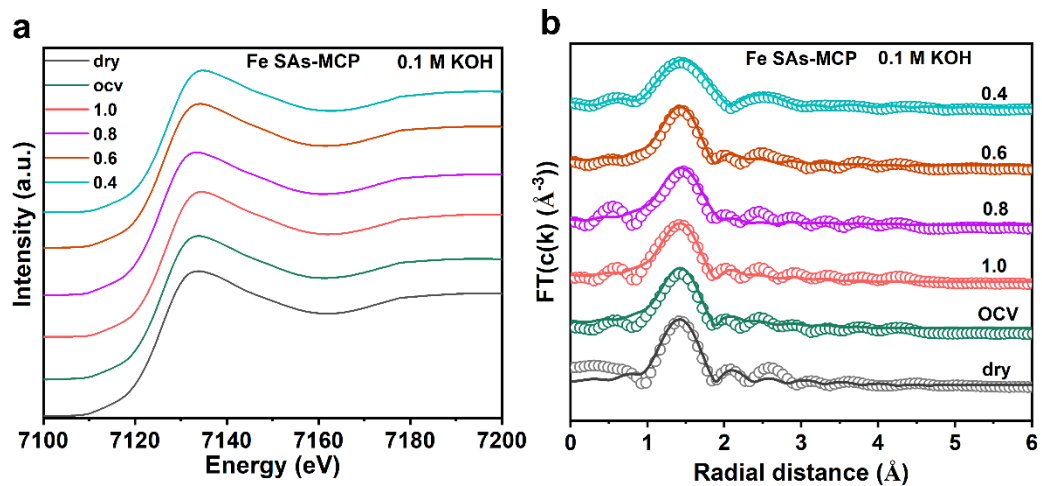

**Supplementary Figure 41. Operando XAS characterizations for Fe SAs-MCP in 0.1 M KOH.** (a) and (b) Operando XANES of Fe K-edge and corresponding FT-EXAFS fitting analysis for Fe SAs-MCP under 0.1 M KOH. The XAS was conducted under O<sub>2</sub> saturated alkaline electrolytes.

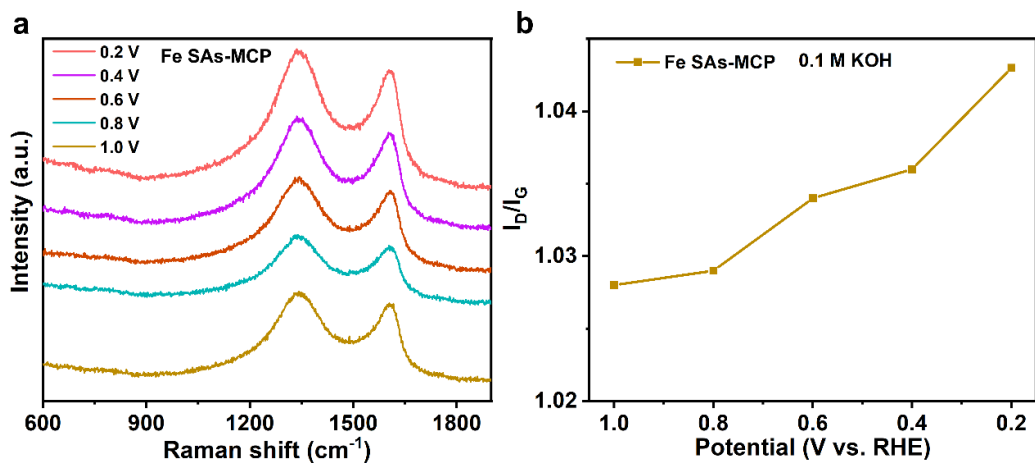

**Supplementary Figure 42. *In situ* Raman for Fe SAs-MCP.** (a) and (b) *In situ* Raman spectra of Fe SAs-MCP tested in 0.1 M KOH and corresponding  $I_D/I_G$  values with applied overpotentials. The  $I_D/I_G$  values increased with the applied overpotentials.

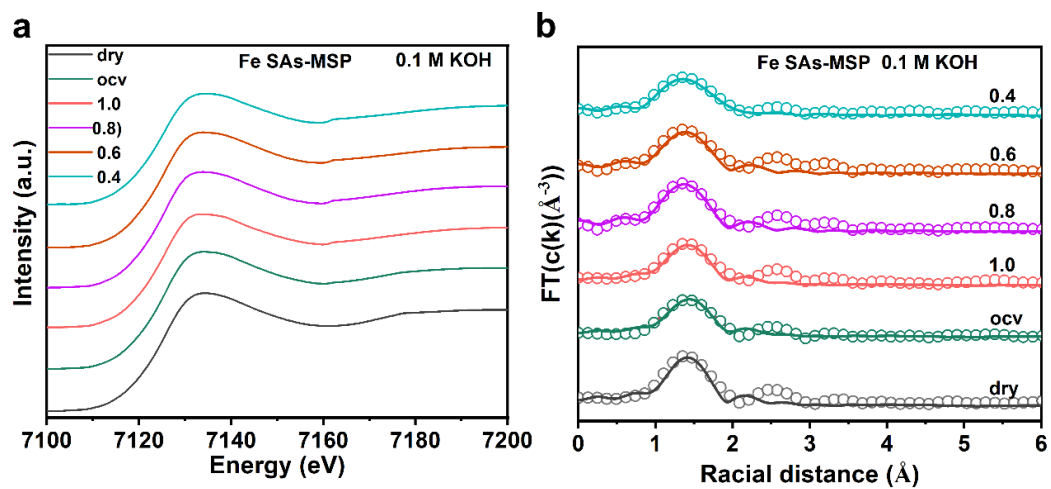

**Supplementary Figure 43. Operando XAS characterizations for Fe SAs-MSP in 0.1 M KOH.** (a) and (b) Operando XANES of Fe K-edge and corresponding FT-EXAFS fitting analysis for Fe SAs-MSP under 0.1 M KOH.

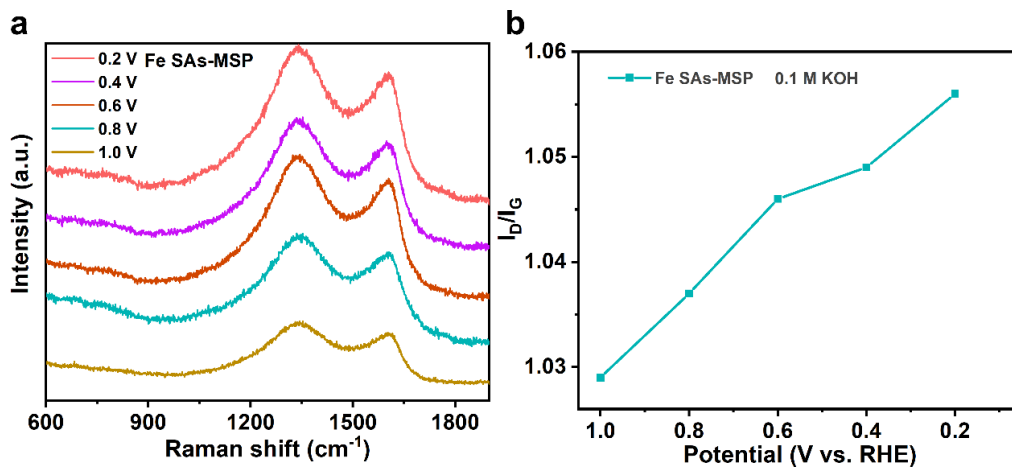

**Supplementary Figure 44.** *In situ* Raman for Fe SAs-MCP. (a) and (b) *In situ* Raman spectra of Fe SAs-MSP tested in 0.1 M KOH and corresponding  $I_D/I_G$  values with applied overpotentials.

## Supplementary Tables

**Supplementary Table 1. BET surface area ( $S_{\text{BET}}$ ) and micropore area ( $S_{\text{mcp}}$ ) of as-prepared catalysts.**

| Catalysts  | $S_{\text{BET}}$ | $S_{\text{mic}}$ | $S_{\text{msp}}$ | $S_{\text{mic}}/S_{\text{BET}}$ |
|------------|------------------|------------------|------------------|---------------------------------|
| Fe SAs-HP  | 578.9            | 344.5            | <b>234.4</b>     | <b>59.5%</b>                    |
| Fe SAs-MCP | 312.7            | 270.1            | <b>42.6</b>      | <b>86.4%</b>                    |
| Fe SAs-MSP | 137.9            | 54.1             | <b>83.8</b>      | <b>39.2%</b>                    |

Considering the relative low proportions of slit-type pores of Fe SAs-MCP and Fe SAs-MSP and the key role of microporous sites in regulating the catalytic performance, the proportion of  $S_{\text{mcp}}$  ( $S_{\text{mcp}}/S_{\text{BET}}$ ) was applied as an indicator to qualify the effect of pore size.

**Supplementary Table 2. Fe contents of synthesized catalysts determined by ICP-MS (weight ratio, wt%)**

| Catalysts       | Fe/ wt% |
|-----------------|---------|
| Fe SAs-HP       | 0.7231  |
| Fe SAs-MCP      | 0.4299  |
| Fe SAs-MSP      | 0.2046  |
| Fe SAs-in plane | 0.0417  |



**Supplementary Table 3. The Fe contents determined by ICP-MS of electrolytes after harsh stability tests for as-prepared catalysts.**

| Samples            | Fe contents in electrolytes (mg/L) |
|--------------------|------------------------------------|
| Fresh electrolytes | 0.0651                             |
| Fe SAs-HP          | 0.1628                             |
| Fe SAs-MCP         | 0.1793                             |
| Fe SAs-MSP         | 0.2673                             |

Fe SAs-MSP had the highest Fe content after harsh stability tests, indicating the disengage of Fe atoms from mesoporous sites.

**Supplementary Table 4. Alkaline ORR performance and peak power density of as-assembled zinc-air batteries (ZAB) of recent reported Catalysts.**

| Catalyst                                      | E <sub>onset</sub><br>(V vs.<br>RHE) | E <sub>1/2</sub> (V<br>vs.<br>RHE) | Peak power density<br>of ZABs (mW<br>cm <sup>-2</sup> ) | Catalyst<br>loadings (mg<br>cm <sup>-2</sup> , RDE) | Reference                                                                      |
|-----------------------------------------------|--------------------------------------|------------------------------------|---------------------------------------------------------|-----------------------------------------------------|--------------------------------------------------------------------------------|
| Fe SAs-HP                                     | 1.06                                 | 0.94                               | 254.2                                                   | 1.0                                                 | This work                                                                      |
| Fe-N/P-C-<br>700                              | 0.94                                 | 0.87                               | 133.2                                                   | 0.6                                                 | <i>J. Am. Chem. Soc.</i> <b>142</b> ,<br>2404–2412<br>(2020) <sup>1</sup>      |
| Fe <sub>H</sub> -N-C                          | -                                    | 0.91                               | 225                                                     | 0.6                                                 | <i>Adv. Mater.</i><br><b>35</b> , 2210714<br>(2023) <sup>2</sup>               |
| FeN <sub>3</sub> OS                           | 1.01                                 | 0.874                              | -                                                       | 0.4                                                 | <i>Angew. Chem. Int. Ed.</i> <b>60</b> ,<br>25296–25301<br>(2021) <sup>3</sup> |
| Fe <sub>1</sub> Se <sub>1</sub> -NC           | 1.0                                  | 0.88                               | -                                                       | 0.2                                                 | <i>Appl. Catal. B-Environ.</i><br><b>308</b> , 121206<br>(2022) <sup>4</sup>   |
| Fe/Meso-<br>NC-1000                           | 0.97                                 | 0.885                              | 188.4                                                   | 0.3                                                 | <i>Adv. Mater.</i><br><b>34</b> , 2107291<br>(2022) <sup>5</sup>               |
| Fe-N-GDY                                      | 1.05                                 | 0.89                               | 249                                                     | 0.4                                                 | <i>Angew. Chem. Int. Ed.</i> <b>61</b> ,<br>e202208238<br>(2022) <sup>6</sup>  |
| OAC                                           | 0.98                                 | 0.85                               | 113                                                     | 0.3                                                 | <i>Appl. Catal. B-Environ.</i><br><b>305</b> , 121058<br>(2022) <sup>7</sup>   |
| Fe-SA-<br>NSFC                                | 1.01                                 | 0.91                               | 247.7                                                   | 0.5                                                 | <i>Nat. Commun.</i><br><b>11</b> , 5892<br>(2020) <sup>8</sup>                 |
| Fe SAs-Fe <sub>2</sub> P<br>NPs/NPCFs-<br>2.5 | 1.03                                 | 0.91                               | 236                                                     | 0.5                                                 | <i>Adv. Mater.</i><br><b>34</b> , 2203621<br>(2022) <sup>9</sup>               |
| Co <sub>2</sub> /Fe-<br>N@CHC                 | 1.03                                 | 0.915                              | 232.4                                                   | 0.3                                                 | <i>Adv. Mater.</i><br><b>33</b> , 2104718<br>(2021) <sup>10</sup>              |
| Fe,Mn/N-C                                     | 0.979                                | 0.928                              | 160.8                                                   | 0.1                                                 | <i>Nat. Commun.</i><br><b>12</b> , 1734<br>(2021) <sup>11</sup>                |

|                  |      |      |     |       |                                                                              |
|------------------|------|------|-----|-------|------------------------------------------------------------------------------|
| Fe,P-<br>DAS@MPC | 1.02 | 0.92 | 230 | 0.255 | <i>Adv. Energy<br/>Mater.</i> <b>13</b> ,<br>2203611<br>(2022) <sup>12</sup> |
|------------------|------|------|-----|-------|------------------------------------------------------------------------------|

---

**Supplementary Table 5. Acidic ORR performance of recently reported Catalysts.**

| Catalyst                            | E <sub>onset</sub><br>(V vs.<br>RHE) | E <sub>1/2</sub><br>(V vs.<br>RHE) | Catalyst<br>loadings (mg<br>cm <sup>-2</sup> , RDE) | Reference                                                                    |
|-------------------------------------|--------------------------------------|------------------------------------|-----------------------------------------------------|------------------------------------------------------------------------------|
| Fe SAs-HP                           | 0.90                                 | 0.78                               | 1.0                                                 | This work                                                                    |
| Fe <sub>1</sub> Se <sub>1</sub> -NC | 0.88                                 | 0.74                               | 0.2                                                 | <i>Appl. Catal. B: Environ.</i> <b>308</b> ,<br>121206 (2022) <sup>4</sup>   |
| OAC                                 | 0.86                                 | 0.71                               | 0.3                                                 | <i>Appl. Catal. B: Environ.</i> <b>305</b> ,<br>121058 (2022) <sup>7</sup>   |
| Fe/OES                              | 0.80                                 | 0.71                               | 0.4                                                 | <i>Angewandte Chemie.</i> <b>132</b> ,<br>7454-7459 (2020) <sup>13</sup>     |
| CoFe@C                              | 0.80                                 | 0.70                               | 0.408                                               | <i>Angewandte Chemie.</i> <b>131</b> ,<br>1997-2001 (2019) <sup>14</sup>     |
| Fe/N-CNRs                           | 0.89                                 | 0.73                               | 0.4                                                 | <i>Adv. Funct. Mater.</i> <b>31</b> ,<br>2008085 (2021) <sup>15</sup>        |
| Fe/Ni-N-PCS<br>DM-SAC               | 0.87                                 | 0.71                               | 0.255                                               | <i>J. Colloid Interf. Sci.</i> <b>633</b> , 828-<br>835 (2023) <sup>16</sup> |
| Fe <sub>50</sub> -N-C-900           | 0.88                                 | 0.73                               | 0.1                                                 | <i>Small.</i> <b>14</b> , 1703118 (2018) <sup>17</sup>                       |
| Fe-N-C/N<br>OMC                     | 0.91                                 | 0.73                               | 0.3                                                 | <i>Appl. Catal. B: Environ.</i> <b>280</b> ,<br>119411 (2021) <sup>18</sup>  |
| FeCu-DA/NC                          | 0.89                                 | 0.78                               | 0.5                                                 | <i>J. Mater. Chem. A.</i> <b>8</b> , 16994-<br>17001 (2020) <sup>19</sup>    |

**Supplementary Table 6. Comparison of TOF and mass activity at 0.8 V for Fe SAs-HP and reported catalysts.**

| catalysts                       | TOF<br>(s <sup>-1</sup> ) | Mass activity (A<br>g <sub>Fe</sub> <sup>-1</sup> ) | reference                                                               |
|---------------------------------|---------------------------|-----------------------------------------------------|-------------------------------------------------------------------------|
| Fe SAs-HP                       | 5.99                      | 4.14 * 10 <sup>4</sup>                              | This work                                                               |
| Fe SACs                         | 4.3                       | 1.5 x 10 <sup>3</sup><br>(GDE)                      | <i>Nat. Catal.</i> <b>4</b> , 615-622 (2021) <sup>20</sup>              |
| Cyan-Fe-N-C                     | 0.79                      | 1.142*10 <sup>3</sup>                               | <i>Adv. Mater.</i> <b>35</b> , 2305945 (2023) <sup>21</sup>             |
| TAP 900@Fe                      | 0.087                     | 4.0                                                 | <i>Adv. Mater.</i> <b>35</b> , 2211022 (2023) <sup>22</sup>             |
| sur-FeN <sub>4</sub> -HPC       | 1.01                      | 16.5                                                | <i>Energy Environ. Sci.</i> <b>15</b> , 2619 (2022) <sup>23</sup>       |
| TPI@Z8(SiO <sub>2</sub> )-650-C | 1.63                      | -                                                   | <i>Nat. Catal.</i> <b>2</b> , 259-268 (2019) <sup>24</sup>              |
| Fe-SA-NSFC                      | 0.22                      | -                                                   | <i>Nat Commun.</i> <b>11</b> , 5892 (2020) <sup>8</sup>                 |
| LTHT-FeP aerogel                | 0.25                      | -                                                   | <i>Angew. Chem. Int. Ed.</i> <b>59</b> , 2483-2489 (2020) <sup>25</sup> |

**Supplementary Table 7. Operando XAS analysis parameters of coordination number (CN) for active Fe sites for Fe SAs-HP in 0.1 M KOH under working conditions.**

| Potentials | path | CN      | R (Å)    | dE        | dW         |
|------------|------|---------|----------|-----------|------------|
| OCV        | Fe-N | 3.9 (2) | 1.94 (3) | -13.9 (5) | 0.0091 (6) |
| 1.0 V      | Fe-N | 3.8 (3) | 1.94 (2) | -13.8 (5) | 0.0091 (6) |
|            | Fe-O | -       | -        | -         | -          |
| 0.8 V      | Fe-N | 3.6 (2) | 1.95 (5) | -14.3 (7) | 0.0082 (8) |
|            | Fe-O | 0.3 (4) | 2.03 (4) | -3.8 (6)  | 0.0088 (6) |
| 0.6 V      | Fe-N | 3.1 (1) | 1.97 (3) | -14.7 (7) | 0.0091 (9) |
|            | Fe-O | 0.6 (3) | 2.04 (3) | -4.2 (4)  | 0.0075 (8) |
| 0.4 V      | Fe-N | 2.9 (3) | 1.99 (4) | -15.7 (5) | 0.0094 (7) |
|            | Fe-O | 0.8 (4) | 2.03 (5) | -3.5 (8)  | 0.0079 (5) |

The number in brackets represents deviation of obtained results. For example, 3.9 (2) means the CN is  $3.9 \pm 0.2$  and 1.94 (3) means the R distance is  $1.94 \pm 0.03$ .

**Supplementary Table 8. Operando XAS analysis parameters of coordination number (CN) for active Fe sites for Fe SAs-HP in 0.1 M HClO<sub>4</sub> under working conditions.**

| Potentials | path | CN      | R (Å)    | dE        | dW         |
|------------|------|---------|----------|-----------|------------|
| OCV        | Fe-N | 3.8 (4) | 1.94 (3) | -15.9 (8) | 0.0082 (6) |
| 1.0 V      | Fe-N | 3.9 (4) | 1.95 (2) | -14.2 (7) | 0.0083 (4) |
|            | Fe-O | -       | -        | -         | -          |
| 0.8 V      | Fe-N | 3.7 (5) | 1.95 (6) | -14.8 (7) | 0.0087 (8) |
|            | Fe-O | 0.1 (3) | 2.04 (4) | -1.7 (4)  | 0.0088 (6) |
| 0.6 V      | Fe-N | 3.6 (6) | 1.96 (5) | -13.1 (8) | 0.0084 (9) |
|            | Fe-O | 0.3 (3) | 2.04 (1) | -3.3 (6)  | 0.0075 (5) |
| 0.4 V      | Fe-N | 3.5 (5) | 1.97 (4) | -13.2 (7) | 0.0081 (8) |
|            | Fe-O | 0.4 (5) | 2.03 (4) | -0.5 (6)  | 0.0079 (5) |

The number in brackets represents deviation of obtained results.

**Supplementary Table 9. Operando XAS analysis parameters of coordination number (CN) for active Fe sites of Fe SAs-MCP in 0.1 M KOH under working conditions.**

| Potentials | path              | CN     | R (Å)   | dE       | dW        |
|------------|-------------------|--------|---------|----------|-----------|
| dry        | Fe-N              | 3.8(2) | 1.94(3) | -7.5(3)  | 0.0084(7) |
| ocv        | Fe-N              | 3.8(2) | 1.95(2) | -8.3(3)  | 0.0083(7) |
| 1.0        | Fe-N              | 3.7(4) | 1.94(3) | -7.9(4)  | 0.0084(6) |
|            | Fe-O              | -      | -       | -        | -         |
| 0.8        | Fe-N              | 3.7(4) | 1.95(5) | -8.6(5)  | 0.0081(5) |
|            | Fe-O              | 0.3(4) | 2.02(4) | -5.2(7)  | 0.0097(7) |
| 0.6        | Fe-N              | 3.2(4) | 1.96(5) | -11.4(5) | 0.0092(7) |
|            | Fe-O              | 0.5(3) | 2.03(3) | -5.7(5)  | 0.0095(6) |
| 0.4        | Fe-N              | 1.8(2) | 1.94(4) | -10.7(6) | 0.0089(7) |
|            | Fe-O <sup>1</sup> | 0.3(4) | 2.03(3) | -4.5(5)  | 0.0079(7) |
|            | Fe-O <sup>2</sup> | 3.6(2) | 2.13(3) | 6.2(5)   | 0.0062(8) |
|            | Fe-Fe             | 6.1(2) | 3.08(4) | -1.8(7)  | 0.0095(7) |

Fe-O<sup>1</sup>: Fe-O scattering path between active Fe centers and oxygenated intermediates.

Fe-O<sup>2</sup>: Fe-O scattering path between active Fe centers and lattice oxygen in FeO.



**Supplementary Table 10. *Operando* XAS analysis parameters of coordination number (CN) for active Fe sites of Fe SAs-MSP in 0.1 M KOH under working conditions.**

| Potentials | path | CN     | R (Å)   | dE       | dW        |
|------------|------|--------|---------|----------|-----------|
| dry        | Fe-N | 3.5(4) | 1.96(2) | -12.3(4) | 0.0105(5) |
| ocv        | Fe-N | 3.5(3) | 1.95(2) | -10.2(5) | 0.0106(4) |
| 1.0        | Fe-N | 3.5(4) | 1.96(4) | -11.5(5) | 0.0106(7) |
|            | Fe-O | -      | -       | -        | -         |
| 0.8        | Fe-N | 3.4(4) | 1.96(5) | -12.5(5) | 0.0111(5) |
|            | Fe-O | 0.3(3) | 2.02(4) | -5.0(6)  | 0.0083(5) |
| 0.6        | Fe-N | 3.1(2) | 1.96(3) | -13.4(4) | 0.0096(5) |
|            | Fe-O | 0.5(2) | 2.02(2) | -5.1(5)  | 0.0081(6) |
| 0.4        | Fe-N | 1.7(3) | 1.92(2) | -11.7(6) | 0.0089(6) |
|            | Fe-O | 0.5(2) | 2.01(4) | -6.5(5)  | 0.0086(6) |

## Supplementary References

1. Yuan, K. et al. Boosting oxygen reduction of single iron active sites via geometric and electronic engineering: nitrogen and phosphorus dual coordination. *J. Am. Chem. Soc.* **142**, 2404-2412 (2020).
2. Tian, H. et al. High durability of Fe-N-C single-atom catalysts with carbon vacancies toward the oxygen reduction reaction in alkaline media. *Adv. Mater.* **35**, 2210714 (2023).
3. Yu, L., Li, Y. & Ruan, Y. Dynamic control of sacrificial bond transformation in the Fe-N-C single-atom catalyst for molecular oxygen reduction. *Angewandte Chemie.* **133**, 25500-25505 (2021).
4. Chen, Z. et al. Boosting oxygen reduction reaction with Fe and Se dual-atom sites supported by nitrogen-doped porous carbon. *Applied Catalysis B: Environmental.* **308**, 121206 (2022).
5. Zhao, S. N., Li, J. K., Wang, R., Cai, J. & Zang, S. Q. Electronically and geometrically modified single-atom Fe sites by adjacent Fe nanoparticles for enhanced oxygen reduction. *Adv. Mater.* **34**, 2107291 (2022).
6. Li, M., Lv, Q., Si, W., Hou, Z. & Huang, C. Sp-hybridized nitrogen as new anchoring sites of iron single atoms to boost the oxygen reduction reaction. *Angewandte Chemie.* **61**, e202208238 (2022).
7. Deng, L. et al. Restricted diffusion preparation of fully-exposed Fe single-atom catalyst on carbon nanospheres for efficient oxygen reduction reaction. *Applied Catalysis B: Environmental.* **305**, 121058 (2022).
8. Zhou, Y. et al. Multilayer stabilization for fabricating high-loading single-atom catalysts. *Nat. Commun.* **11**, 5892 (2020).
9. Pan, Y. et al. Construction of N, P co-doped carbon frames anchored with Fe single atoms and Fe<sub>2</sub>P nanoparticles as a robust coupling catalyst for electrocatalytic oxygen reduction. *Adv. Mater.* **34**, 2203621 (2022).
10. Wang, Z. et al. Atomically dispersed Co<sub>2</sub>-N<sub>6</sub> and Fe-N<sub>4</sub> costructures boost oxygen reduction reaction in both alkaline and acidic media. *Adv. Mater.* **33**, 2104718 (2021).
11. Yang, G. et al. Regulating Fe-spin state by atomically dispersed Mn-N in Fe-N-C catalysts with high oxygen reduction activity. *Nat. Commun.* **12**, 1734 (2021).
12. Zong, L. et al. Promoting oxygen reduction reaction on atomically dispersed Fe sites via

- establishing hydrogen bonding with the neighboring P atoms. *Adv. Energy Mater.* **13**, 2203611 (2023).
13. Hou, C. C. et al. Single-atom iron catalysts on overhang-eave carbon cages for high-performance oxygen reduction reaction. *Angewandte Chemie.* **132**, 7454-7459 (2020).
  14. Zhao, R. et al. Puffing up energetic metal-organic frameworks to large carbon networks with hierarchical porosity and atomically dispersed metal sites. *Angewandte Chemie.* **131**, 1997-2001 (2019).
  15. Gong, X. et al. Self-templated hierarchically porous carbon nanorods embedded with atomic Fe-N<sub>4</sub> active sites as efficient oxygen reduction electrocatalysts in Zn-air batteries. *Adv. Funct. Mater.* **31**, 2008085 (2021).
  16. Zhao, J. et al. Synthesis of dual-metal single atom in porous carbon with efficient oxygen reduction reaction in both acidic and alkaline electrolytes. *J. Colloid Interf. Sci.* **633**, 828-835 (2023).
  17. Fu, S. et al. Porous carbon-hosted atomically dispersed iron-nitrogen moiety as enhanced electrocatalysts for oxygen reduction reaction in a wide range of pH. *Small.* **14**, 1703118 (2018).
  18. Han, J. et al. 3D N-doped ordered mesoporous carbon supported single-atom Fe-N-C catalysts with superior performance for oxygen reduction reaction and zinc-air battery. *Applied Catalysis B: Environmental.* **280**, 119411 (2021).
  19. Du, C. et al. A Cu and Fe dual-atom nanozyme mimicking cytochrome c oxidase to boost the oxygen reduction reaction. *J. Mater. Chem. A.* **8**, 16994-17001 (2020).
  20. Jin, Z. et al. Understanding the inter-site distance effect in single-atom catalysts for oxygen electroreduction. *Nat. Catal.* **4**, 615-622 (2021).
  21. Yuan, L. J. et al. d-orbital electron delocalization realized by axial Fe<sub>4</sub>C atomic clusters delivers high-performance Fe-N-C catalysts for oxygen reduction reaction. *Adv. Mater.* **35**, (2023).
  22. Barrio, J. et al. FeNC Oxygen Reduction Electrocatalyst with High Utilization Penta - Coordinated Sites. *Adv. Mater.* **35**, 2305945 (2023).
  23. Chen, G. et al. Highly accessible and dense surface single metal FeN<sub>4</sub> active sites for promoting the oxygen reduction reaction. *Energ. Environ. Sci.* **15**, 2619-2628 (2022).
  24. Wan, X. et al. Fe-N-C electrocatalyst with dense active sites and efficient mass transport for high-performance proton exchange membrane fuel cells. *Nat. Catal.* **2**, 259-268 (2019).

25. Zion, N., Cullen, D. A., Zelenay, P. & Elbaz, L. Heat-treated aerogel as a catalyst for the oxygen reduction reaction. *Angewandte Chemie International Edition*. **59**, 2483-2489 (2020).
